# Supplementary material for: Implementation of the sectional aerosol module SALSA into the PALM model system 6.0: Model development and first evaluation
Source: Copernicus journal article supplement (doi:10.5194/gmd-2018-282), 2018-11-28
Supplement: Supplementary file [file gmd-2018-282-AC2-supplement.zip]

# Implementation of the sectional aerosol module ~~SALSA~~SALSA2.0 into the PALM model system 6.0: Model development and first evaluation

Mona Kurppa<sup>1</sup>, Antti Hellsten<sup>2</sup>, Pontus Roldin<sup>1,3</sup>, Harri Kokkola<sup>4</sup>, Juha Tonttila<sup>4</sup>, Mikko Auvinen<sup>1,2</sup>, Christoph Kent<sup>5</sup>, Prashant Kumar<sup>6</sup>, Björn Maronga<sup>7,8</sup>, and Leena Järvi<sup>1,9</sup>

<sup>1</sup>Institute for Atmospheric and Earth System Research / Physics, Faculty of Science, University of Helsinki, P.O. Box 68, 00014 Helsinki, Finland

<sup>2</sup>Finnish Meteorological Institute, 00101 Helsinki, Finland

<sup>3</sup>Division of Nuclear Physics, Lund University, 22100 Lund, Sweden

<sup>4</sup>Finnish Meteorological Institute, 70211 Kuopio, Finland

<sup>5</sup>Department of Meteorology, University of Reading, Reading RG6 6BB, United Kingdom

<sup>6</sup>Global Centre for Clean Air Research (GCARE), Department of Civil & Environmental Engineering, University of Surrey, Guildford GU2 7XH, United Kingdom

<sup>7</sup>Leibniz University Hannover, Institute of Meteorology and Climatology, 30419 Hannover, Germany

<sup>8</sup>Geophysical Institute, University of Bergen, 5020 Bergen, Norway

<sup>9</sup>Helsinki Institute of Sustainability Science, University of Helsinki, 00014 Helsinki, Finland

*Correspondence to:* Mona Kurppa (mona.kurppa@helsinki.fi)

**Abstract.** Urban pedestrian-level air quality is a result of an interplay between turbulent dispersion conditions, background concentrations and heterogeneous local emissions of air pollutant and their transformation processes. Still, the complexity of these interactions cannot be resolved by the commonly used air quality models. By embedding the sectional aerosol module ~~SALSA~~SALSA2.0 to the large-eddy simulation model PALM, a novel, high-resolution, urban aerosol modelling framework has been developed. The first model evaluation study on the vertical variation of aerosol number concentration and size distribution in a simple street canyon without vegetation in Cambridge, UK, shows ~~excellent~~good agreement with measurements with simulated values mainly within a factor of two of observations. Dispersion conditions and local emissions govern the pedestrian-level aerosol number concentrations. Out of different aerosol processes, dry deposition is shown to decrease the total number concentration by over 20 %, while condensation and dissolutional increase the total mass by over 10 %. Following the model development, the application of PALM can be extended to local- and neighbourhood-scale air pollution and aerosol studies that require a detailed solution of the ambient flow field.

*Copyright statement.*

## 1 Introduction

The coincidence of rising population densities, high air pollutant emissions and limited ventilation in urban areas leads to an increasing number of ~~air-pollution-related~~air-pollution-related health problems and premature deaths globally every year (Gakidou et al., 2017; WHO, 2016). The local air quality is an outcome of complex interactions between the urban landscape, meteorology, background pollutant concentrations and local emissions as well as chemical and physical processes of air pollutants. Thereby, urban air pollutant concentration fields are highly irregular in both time and space (e.g. Kumar et al., 2011). At the same time, pollutant characteristics such as the size of aerosol particles and chemical compositions of both particles and gaseous mixtures are essential factors in determining the health impacts (for review, see e.g. Kelly and Fussell, 2012). Traditionally used local urban air quality models, such as Gaussian dispersion or semi-empirical street pollution models, cannot resolve these details in concentration fields and interactions due to an inadequate representation of the urban complexity and limitations in resolving any fine-scale flow structures (Tominaga and Stathopoulos, 2016).

Detailed information on the ~~air-pollutant-concentration-variability-in-urban-areas-is-however~~variability of urban air pollutant concentrations are, however, highly valuable to urban planning ~~in-order~~ to design healthy living environments (Giles-Corti et al., 2016; Kurppa et al., 2018), to air quality monitoring network design and to conducting exposure studies. Therefore, a building-resolving tool for simulating and predicting air quality in real complex urban environments in current and future conditions is needed. To determine the air flow and dispersion, computational fluid dynamics (CFD) models and notably the large-eddy simulation (LES) are currently the most promising methods. Compared to LES, Reynolds-averaged Navies-Stokes (RANS) -based turbulence models can be computationally less demanding but their ability to resolve the instantaneous turbulence structures above a complex urban surface is shown to ~~clearly-underperform~~be clearly weaker (e.g. Antoniou et al., 2017; García-Sánchez et al., 2018, and references within). By either method, the computational costs have been the bottleneck in extending CFD based air quality modelling from tail-pipe emission studies (e.g. Huang et al., 2014; Liu et al., 2011) to the neighbourhood scale studies. Fortunately, constantly increasing computational power has already allowed urban LES modelling for entire neighbourhoods up to one day or even more in a supercomputing environment (e.g. Resler et al., 2017). Currently, there exists a number of RANS and LES models coupled with some chemical mechanism (Zhong et al., 2016), a few RANS models with an aerosol module, for instance Mercure\_Saturne with MAM (Albriet et al., 2010) and ANSYS Fluent based models (Uhrner et al., 2007; Huang et al., 2014) such as CTAG (Wang and Zhang, 2012), and at least one LES model including a detailed aerosol module (Liu et al., 2011), which is however only applied in a tail-pipe emission study. The CTAG model has also been run in a LES mode (Steffens et al., 2013), but to date ~~only-aerosol-dry-deposition-has-been-studied~~aerosol simulations have only considered dry deposition (Tong et al., 2016a, b) and the chemical composition has been usually ignored.

The fate of aerosol particles in the atmosphere depends substantially on their size distribution. Consequently, detailed aerosol modelling requires size-specific emission and background information as input. Estimates for background aerosol size distributions and concentrations can be attained from larger scale models, whereas emission data is usually treated as total aerosol mass. Hence, emission size distribution has to be estimated based on the source type and vehicle fleet in case of traffic emissions. If any important emission source is neglected, aerosol processes are also calculated erroneously. At the same time,

as LES outperforms traditionally used urban air quality models in resolving the turbulent field and pollutant dispersion, LES-based air quality models produce unique information on pollutant transformation and dispersion processes with accurate emission estimates.

The numerical approaches to describe the aerosol size distribution and to solve the aerosol general dynamic equations can generally be divided into modal, moment and sectional approaches. The modal aerosol modules (Ackermann et al., 1998; Liu et al., 2012; Vignati et al., 2004) represent the continuous aerosol size distribution as ~~an~~ a superposition of several modes (usually log-normal distributions), whereas moment-based methods track the lower-order radial moments of the aerosol size distribution (McGraw, 1997). Both approaches are computationally efficient due to the small number of prognostic variables. However, the modal approach lacks accuracy in simulating the evolution of the aerosol size distribution, especially if the standard deviations of log-normal modes are not allowed to vary (Whitby and McMurry, 1997; Zhang et al., 1999). Applying the moment approach, instead, requires resolving a closure problem of the moment evolution equations (Wright et al., 2001). Furthermore, as aerosol properties are tied into moments, which are typically not observed properties except for the first moments, retrieving information on aerosol properties during the simulation increases the computational load. In the sectional approach (Gong et al., 2003; Zaveri et al., 2008; Zhang et al., 2004), the aerosol size distribution is represented as a discrete set of size bins. Sectional approach is flexible and accurate, but usually computationally more demanding due to the high number of prognostic variables.

To meet the needs of a high-resolution urban air quality model that can account for the complex interactions controlling the local air quality at the neighbourhood to city scale, this article presents the implementation of the aerosol module ~~SALSA (Sectional Aerosol Module for Large Scale Applications, Kokkola et al., 2008)~~ SALSA2.0 (Sectional Aerosol Module for Large Scale Ap a part of the PALM model system (see Maronga et al. (2015) for the description of PALM 4.0; a description of version 6.0 is envisaged in ~~Maronga, B. et al. (2019)~~ in this special issue of Geoscientific Model Development). The aim is to include the aerosol dynamic processes into PALM, evaluate the model performance under different meteorological-wind conditions, and study the relative impact of aerosol processes on the aerosol size ~~distributions and chemical compositions~~ distribution and chemical composition in real urban environment.

The modelling methods and equations of ~~SALSA~~ SALSA2.0, implementation to PALM, computational costs and inevitable numerical issues related to the sectional representation are discussed in Sect. 2. The model evaluation set-up and sensitivity tests are described in Sect. 3 and the ~~model results~~ results of the model simulations in Sect. 4. Finally, Sect. 5 discusses the applications and limitations of the model.

## 2 Model description

### 2.1 PALM

The PALM model system (version 6.0) features an LES core for atmospheric and oceanic boundary layer flows, which solves the non-hydrostatic, filtered, incompressible Navier-Stokes equations of wind ( $u, v$ , and  $w$ ) and scalar variables (sub-grid scale turbulent kinetic energy  $e$ , potential temperature  $\theta$  and specific humidity  $q$ ) in Boussinesq-approximated form.

Note that PALM, originally developed as a pure LES code, nowadays also offers a RANS-type turbulence parametrisation. PALM is especially suitable for complex urban areas owing to its features such as a Cartesian topography scheme, a plant canopy module and recent model enhancements as so-called PALM-4U (short for: PALM for urban applications) components such as an urban surface scheme (first version described in Resler et al., 2017) and a land surface scheme (first description in Maronga and Bosveld, 2017). Furthermore, other PALM-4U components, such as chemistry and indoor climate modules, have or are currently being implemented in the PALM model system to develop a modern and highly-efficient urban climate model (Maronga et al., 2019). Due to its excellent scalability on massively parallel computer architectures (up to 50,000 processor cores; Maronga et al., 2015), PALM is applicable for carrying out computationally expensive simulations over large, neighbourhood- and city-scale domains with a sufficiently high grid resolution for urban LES (Auvinen et al., 2017; Xie and Castro, 2006). The performance of PALM over urban-like surfaces has been successfully evaluated against wind tunnel simulations, previous LES studies and field measurements (Kanda et al., 2013; Letzel et al., 2008; Park et al., 2015; Razak et al., 2013). Some fundamental technical specifications of PALM are represented in Table 1.

**Table 1.** The technical specifications of the LES model PALM.

| Property                | Characteristics                                                                                                                                                                                                                                                                                                                                                     |
|-------------------------|---------------------------------------------------------------------------------------------------------------------------------------------------------------------------------------------------------------------------------------------------------------------------------------------------------------------------------------------------------------------|
| Programming language    | Fortran 95/2003                                                                                                                                                                                                                                                                                                                                                     |
| Discretisation in space | Arakawa staggered C-grid (Harlow and Welch, 1965; Arakawa and Lamb, 1977)                                                                                                                                                                                                                                                                                           |
| Parallelization         | Two-dimensional decomposition (Raasch and Schröter, 2001). Communication between processors realized using Message Passing Interface (MPI). Also OpenMP parallelization of loops and a hybrid mode allowed.                                                                                                                                                         |
| Sub-grid scale closure  | 1.5-order scheme based on Deardorff (1980) and modified by Moeng and Wyngaard (1988) and Saiki et al. (2000).                                                                                                                                                                                                                                                       |
| Time-integration scheme | 3rd-order Runge-Kutta approximation (Williamson, 1980).                                                                                                                                                                                                                                                                                                             |
| Wall model              | By default Monin-Obukhov similarity theory (MOST, Monin and Obukhov, 1954). <del>Is a</del> <u>If the</u> surface scheme is switched on, the momentum flux is calculated via MOST, while surface fluxes of sensible and latent heat are calculated based on an energy balance solver for the surface temperature and a party MOST-based resistance parametrisation. |

## 2.2 SALSA

~~SALSA~~ SALSA2.0 (referred to hereafter simply as SALSA) was selected as the basis for representing aerosol dynamics in PALM since one major criteria in its development has been limiting computational expenses without the cost of accuracy. ~~Despite being originally designed for~~ A major share of the expenses stem from having a large number of prognostic variables

to describe the aerosol population. SALSA has been optimized for resolving aerosol microphysics in very large number of grid points, such as in global-scale applications, SALSA is equally suitable for presenting aerosol dynamics also climate models. Nonetheless, the same aerosol processes and model design choices are relevant at local scale.

- In SALSA, the aerosol number size distribution is discretised into  $X_B$  size bins  $i$  based on the mean dry particle diameter  $\bar{D}_i$  of each bin. The number  $n_i$  ( $\text{m}^{-3}$ ) and mass concentration  $m_{c,i}$  ( $\text{kg m}^{-3}$ ) of each chemical component  $c$  are the model prognostic variables. SALSA was originally optimized for computationally expensive large scale climate models, and therefore, the number of size bins is kept to the minimum (default  $X_B = 10$ ) and only the following chemical components can currently be included: sulphuric acid ( $\text{H}_2\text{SO}_4$ ), organic carbon (OC), black carbon (BC), nitric acid ( $\text{HNO}_3$ ), ammonium ( $\text{NH}_3$ ), sea salt, dust and water ( $\text{H}_2\text{O}$ ). Furthermore, the gaseous concentrations of  $\text{H}_2\text{SO}_4$ ,  $\text{HNO}_3$ ,  $\text{NH}_3$  and semi- and non-volatile organics (SVOC and NVOC), that can condense or dissolve on aerosol particles, are also default prognostic variables. Nitrates and ammonia-ammonium were not included in the original SALSA but have been later added (Kudzotsa et al.). The sectional size distribution can be further divided into subranges 1 ( $\bar{D}_i \lesssim 50$  nm) and 2 ( $\bar{D}_i \gtrsim 50$  nm). Subrange 1 consists of smallest particles assumed to be internally mixed, strongly hygroscopic, and containing only  $\text{H}_2\text{SO}_4$ , OC,  $\text{HNO}_3$  and/or  $\text{NH}_3$ . Subrange 2 can contain all chemical components and it can be further divided into strongly hygroscopic (2a) and weakly hygroscopic (2b) subranges to allow for the description of externally mixed aerosol particle populations (Kokkola et al., 2018). The evolution of aerosol size distribution is represented using the sectional hybrid-bin method (Young, 1974; Chen and Lamb, 1994). As a difference to the original SALSA,  $\bar{D}_i$  is calculated as the geometric mean diameter instead of the arithmetic mean. Assuming spherical particles, the later tends to overestimate the total volume  $\bar{V}_i = \frac{\pi}{6} \bar{D}_i^3$  especially for larger aerosol particles when  $X_B \sim 10$ .
- The original SALSA contains detailed descriptions for the aerosol dynamic processes of nucleation, condensation, dissolutional growth and coagulation, and here it has been further extended by including dry deposition on solid surfaces and resolved-scale vegetation and gravitational settling. Resuspension of fine aerosol particles-The process of particle resuspension from surfaces is usually negligible and hence neglected-currently neglected. However, resuspension of road dust, for example, can be included in the model as an additional surface emission (see Section 2.2.5).
- Detailed description of the aerosol source/sink terms is given below (and in Kokkola et al. (2008) and Tonttila et al. (2017)).

### 2.2.1 Coagulation

Coagulation decreases the aerosol number as two aerosol particles collide to form one larger particle. In SALSA, coagulation is solved using the non-iterative method by Jacobson (2005). For  $n_i$ ,

$$n_{i,t} = \frac{n_{i,t-\Delta t}}{1 + \Delta t \sum_{j=i+1}^{X_B} \beta_{i,j} n_{j,t-\Delta t} + \frac{1}{2} \Delta t \beta_{i,i} n_{i,t-\Delta t}} \quad (1)$$

and similarly, for  $m_{c,i}$

$$m_{c,i,t} = \frac{\rho_c \left( v_{c,i,t-\Delta t} + \Delta t \sum_{j=1}^{i-1} \beta_{j,i} v_{c,j,t} n_{j,t-\Delta t} \right)}{1 + \Delta t \sum_{j=i+1}^{X_B} \beta_{i,j} n_{j,t-\Delta t}}. \quad (2)$$

Here,  $t$  and  $t - \Delta t$  are the current and previous time steps,  $\beta_{i,j}$  is the coagulation kernel ( $\text{m}^3 \text{s}^{-1}$ ) of the colliding aerosol particles in size bins  $i$  and  $j$ , and  $\rho_c$  is the density.  $v_{c,i}$  is the aerosol volume concentration of chemical component  $c$  in size

bin  $i$  and  $\rho_c$  is its density. The coagulation kernel  $\beta_{i,j} = E_{\text{coal},i,j} K_{i,j}$  is the product of a collision kernel  $K_{i,j}$  ( $\text{m}^3 \text{s}^{-1}$ ) and a dimensionless coalescence efficiency  $E_{\text{coal},i,j}$ . For aerosol particles smaller than  $2 \mu\text{m}$  in radius,  $E_{\text{coal},i,j}$  can be approximated as unity (i.e. particles stick together) as the likelihood of bounce-off is low (Beard and Ochs, 1984). Brownian coagulation is assumed for aerosol particles, for which  $K_{i,j}$  in the transition regime is calculated with the interpolation formula by Fuchs (1964),

$$K_{i,j} = \frac{4\pi(r_i + r_j)(\Gamma_{p,i} + \Gamma_{p,j})}{\frac{r_i + r_j}{r_i + r_j + \sqrt{\delta_i^2 + \delta_j^2}} + \frac{4(\Gamma_{p,i} + \Gamma_{p,j})}{\sqrt{v_{p,i}^2 + v_{p,j}^2}(r_i + r_j)}}, \quad (3)$$

where  $r_i$  (m) is the particle radius,  $\Gamma_{p,i}$  ( $\text{m}^2 \text{s}^{-1}$ ) is the particle diffusion coefficient,  $\delta_i$  (m) is the mean distance from the centre of the sphere reached by particles leaving the surface of the sphere and travelling a distance of particle mean free path, and  $v_{p,i}$  ( $\text{m s}^{-1}$ ) is the thermal speed of a particle in air.

### 2.2.2 Condensation and dissolutional growth

Condensation of gases on an aerosol particle increases the particle volume and decreases the gas phase concentrations. For water vapour,  $\text{H}_2\text{SO}_4$ , NVOC and SVOC condensation is calculated applying the analytical predictor of condensation scheme (Jacobson, 2005), in which the vapour mole concentration  $C_{c,t}$  at time step  $t$  after condensation is first calculated as

$$C_{c,t} = \frac{C_{c,t-\Delta t} + \Delta t \sum_{i=1}^{X_B} (k_{c,i,t-\Delta t} S'_{c,i,t-\Delta t} C_{c,s,i,t-\Delta t})}{1 + \Delta t \sum_{i=1}^J k_{c,i,t-\Delta t}}, \quad (4)$$

where  $k_{c,i,t-\Delta t}$  is the particle volume-dependent mass-transfer coefficient ( $\text{s}^{-1}$ ) in size bin  $i$  at the previous time step  $t - \Delta t$ ,

$S'_{c,i,t-\Delta t}$  is the equilibrium saturation ratio and  $C_{c,s,i,t-\Delta t}$  is an uncorrected saturation vapour mole concentration ( $\text{mol m}^{-3}$ ) of the condensing gas  $c$ . The change in particle mole concentration  $c_{c,i,t}$  in the aerosol size bin  $i$  is then given by a formula

$$c_{c,i,t} = c_{c,s,i,t-\Delta t} + k_{c,i,t-\Delta t} (C_{c,t} - S'_{c,i,t-\Delta t} C_{c,s,i,t-\Delta t}), \quad (5)$$

which is then translated to aerosol number and mass concentrations. Condensation and evaporation of water vapour on aerosol particles would require a very short time step to avoid non-oscillatory solutions. The applied solution used in SALSA is

described in Tonttila et al. (2017).

Furthermore, aerosol particles may further grow due to dissolutional growth when a gas transfers to a particle surface and dissolves in liquid water on the surface. This partitioning between the gaseous and particulate phases is solved for water vapour, nitric acid and ammonia using the analytical predictor of dissolution (APD) scheme (Jacobson, 2005) in the following way. First, the vapour mole concentration  $C_{c,t}$  after dissolutional growth at time step  $t$  is calculated as

$$C_{c,t} = \frac{C_{c,t-\Delta t} + \sum_{i=1}^{X_B} \left\{ c_{c,i,t-\Delta t} \left[ 1 - \exp \left( -\frac{\Delta t S'_{c,i,t-\Delta t} k_{c,i,t-\Delta t}}{H'_{c,i,t-\Delta t}} \right) \right] \right\}}{1 + \sum_{i=1}^{X_B} \left\{ \frac{H'_{c,i,t-\Delta t}}{S'_{c,i,t-\Delta t}} \left[ 1 - \exp \left( -\frac{\Delta t S'_{c,i,t-\Delta t} k_{c,i,t-\Delta t}}{H'_{c,i,t-\Delta t}} \right) \right] \right\}}. \quad (6)$$

Here  $H'_{c,i}$  is the dimensionless Henry's constant for chemical compound  $c$  in size bin  $i$

$$H'_{c,i} = m_v c_{w,i} R^* T H_c, \quad (7)$$

where  $m_v$  ( $\text{mol m}^{-3}$ ) is the molecular weight of water,  $c_{w,i}$  ( $\text{mol m}^{-3}$ ) is the mole concentration of liquid water in aerosol size bin  $i$ ,  $R^* = 8.206 \text{ m}^3 \text{ atm K}^{-1} \text{ mol}^{-1}$  is the universal gas constant,  $T$  (K) is the ambient temperature, and  $H_c$  ( $\text{mol kg}^{-1} \text{ atm}^{-1}$ ) is the Henry's law constant estimated by the thermodynamic model PD-FiTE (Topping et al., 2009). Finally, the new particle mole concentration  $c_{c,i,t}$  is given by

$$c_{c,i,t} = \frac{H'_{c,i,t-\Delta t} C_{c,t}}{S'_{c,i,t-\Delta t}} + \left( c_{c,i,t} - \frac{H'_{c,i,t-\Delta t} C_{c,t}}{S'_{c,i,t-\Delta t}} \right) \exp \left( -\frac{\Delta t S'_{c,i,t-\Delta t} k_{c,i,t-\Delta t}}{H'_{c,i,t-\Delta t}} \right), \quad (8)$$

which is then translated to number and mass concentrations. Evaporation of gases from aerosol particle surfaces, with water being an exception, is not considered.

### 2.2.3 Dry deposition and gravitational settling

Dry deposition removes aerosol particles from air when they collide with a surface and stick to it. Here the original scheme in SALSA allowing dry deposition on horizontal surfaces was extended by including deposition also on vertical solid surfaces (e.g. building walls) and resolved-scale vegetation. Deposition on sub-grid vegetation (e.g. grass surface) is not yet implemented. By default, dry deposition velocity  $v_d$  ( $\text{m s}^{-1}$ ) is calculated applying the size-segregated scheme by Zhang et al. (2001) (hereafter Z01), which is the most applied dry deposition scheme in numerical studies. For size bin  $i$ :

$$v_{d,i} = \underbrace{\frac{(\rho_p - \rho_a) \bar{D}_i^2 g G_i}{18 \eta_a}}_{\text{settling velocity, } v_{c,i}} + \epsilon_0 u_* \exp(-St_i^{1/2}) \left[ \underbrace{S c_i^{-\gamma}}_{\text{Brownian diffusion}} + \underbrace{\left( \frac{St_i}{\alpha + St_i} \right)^\beta}_{\text{impaction}} + \underbrace{\frac{1}{2} \left( \frac{\bar{D}_i}{A} \right)^2}_{\text{interception}} \right], \quad (9)$$

where  $\rho_p$  and  $\rho_a$  are the particle and air densities ( $\text{kg m}^{-3}$ ),  $g$  ( $\text{m s}^{-2}$ ) is the gravitational acceleration,  $G_i$  is the Cunningham slip correction factor,  $\eta_a$  ( $\text{kg m}^{-1} \text{ s}^{-1}$ ) is the dynamic viscosity of air,  $\epsilon_0 = 3$  and  $\beta = 2$  are empirical constants,  $u_*$  ( $\text{m s}^{-1}$ )

is the friction velocity of above a surface,  $St_i$  is the Stokes number,  $Sc_i$  is the particle Schmidt number,  $\gamma$  and  $\alpha$  are empirical constants that depend on the surface type, and  $A$  is the characteristic radius of the different surface types and seasonal categories. Note that the aerodynamic resistance in the original Z01 formulation is not considered here as LES resolves the aerodynamic effect explicitly. For solid surfaces,  $u_*$  is solved within PALM applying a stability-adjusted logarithmic wind profile, whereas for the resolved-scale vegetation an estimation  $u_* = \sqrt{C_D} U$  (Prandtl, 1925), where  $C_D$  is the canopy drag coefficient and  $U = \sqrt{u^2 + v^2 + w^2}$  is the three-dimensional wind speed, is applied. Z01 has been suggested to overestimate  $v_d$  for submicron particles (Petroff and Zhang, 2010; Mingxuan et al., 2018), and therefore as an alternative to Z01, the formulation by Petroff and Zhang (2010) (hereafter P10) for the deposition velocity can be used (see Supplement information (SI), Sect. S1). The different parametrisations Z01 and P10 for  $v_d$  over built surfaces and deciduous broadleaf trees during leaf-on period are visualised in Fig. 1.

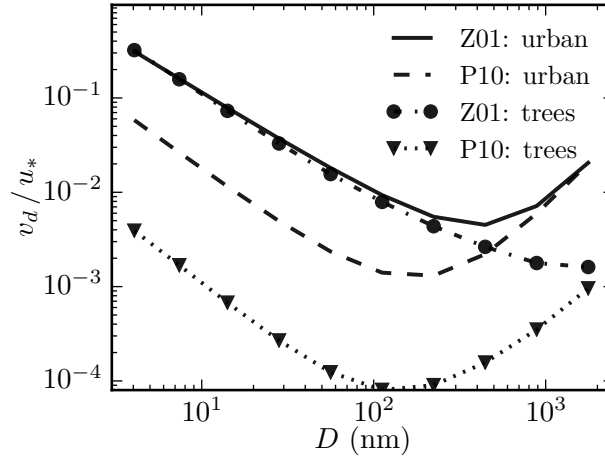

**Figure 1.** Normalised deposition velocity  $v_d / u_*$  as a function of aerosol particle diameter  $D$  (nm) for urban surfaces (solid and dashed lines) and deciduous broadleaf trees (dash-dot line with circles and dotted line with triangles) using the parametrisation by Zhang et al. (Z01, 2001) and Petroff and Zhang (P10, 2010).

Dry deposition on vegetation creates a local sink term

$$\frac{\partial n_i}{\partial t} = -\text{LAD } v_{d,i} n_{i,t-\Delta t}, \quad (10)$$

which depends on the local leaf area density (LAD), whereas dry deposition on horizontal surfaces and building walls is implemented by means of surfaces fluxes

$$F_{n_i} = -v_{d,i} n_{i,t-\Delta t}. \quad (11)$$

The same equations apply for  $m_{c,i}$ . When not in contact with a surface, only gravitational settling contributes to dry deposition and generates a downward flux of particles, which is however mainly important for large particles ( $D > 1.0 \mu\text{m}$ ) (Zhang et al.,



2001; Petroff and Zhang, 2010). Dry deposition and gravitational settling are currently calculated only for aerosol particles, and not for gaseous components.

#### 2.2.4 New particle formation

In the model evaluation represented here, nucleation is assumed to have already occurred (Rönkkö et al., 2007; Uhrner et al., 2007) and the nucleation mode aerosol particles are given to the model as an input. Notwithstanding, new particle formation by sulphuric acid can be taken into account by calculating the apparent rate of formation of 3 nm sized aerosol particles according to the parametrisation by Kerminen and Kulmala (2002), Lehtinen et al. (2007) or Anttila et al. (2010). To calculate the "real" nucleation rate, user can choose between the binary (Vehkamäki et al., 2002), ternary (Napari et al., 2002a, b), kinetic (Sihto et al., 2006; Riipinen et al., 2007) or activation-type (Riipinen et al., 2007) nucleation.

#### 10 2.2.5 Emissions

Aerosol particle emissions can be given to the model as an input applying three levels of detail (LOD): parametrised (LOD1, units  $\text{kg m}^{-2} \text{s}^{-1}$ ) or detailed (LOD2, units  $\text{m}^{-2} \text{s}^{-1}$ ) 2-dimensional surface fluxes, or 3-dimensional sources (LOD3, units  $\text{m}^{-3} \text{s}^{-1}$ ). Using LOD1, aerosol emissions are given as particulate mass (PM) emissions, from which the size-segregated number emissions  $E_{n_i}$  are calculated within the model implementing default aerosol size distributions and mass compositions for each emission category EC (e.g. traffic, domestic heating, etc.). LOD2 and LOD3 emission data include  $E_{n_i}$  and the mass composition per each EC, based on which the mass emission per size bin  $i$  and chemical component  $c$  are then calculated within the model. Gaseous emissions can be specified using any LOD. The time dependency of the aerosol emissions has not been implemented yet.

### 2.3 Model coupling and steering

20 SALSA is integrated to PALM as an optional PALM-4U module, which directly utilises the momentum and scalar concentration fields of the parent model as input. The aerosol source/sink terms are resolved sequentially at a user-specified frequency  $f_{\text{SALSA}}$ , while the prognostic equations and thus transport of aerosol number and mass as well as gas concentrations are resolved at every LES time step  $\Delta t_{\text{LES}}$  in PALM. Molecular diffusion is assumed negligible compared with the turbulent diffusion and is thus ignored.

25 Since water is a default chemical component in SALSA, PALM needs to be run in the humid mode (i.e. calculate the prognostic equation for specific humidity  $q$ ). The particle water content  $m_{\text{H}_2\text{O},i}$  per size bin  $i$  can be represented either as a prognostic variable, or as a diagnostic variable and calculated at each  $\Delta t_{\text{SALSA}}$  based on the equilibrium solution using the ZSR method (Stokes and Robinson, 1966). The feedback on the temperature and humidity due to condensation of water vapour on particles can be switched off. Moreover, SALSA can be run together with the available PALM-4U chemistry module to transfer  
30 the gas concentrations, while the impact of aerosol particles on radiative transfer has not been implemented yet.

## 2.4 Computational expenses

**Table 2.** The relative change in the total computational time over a  $20 \text{ m} \times 20 \text{ m} \times 20 \text{ m}$  modelling domain with different configurations for SALSA. The number of simulated size bins  $X_B = 10$ , time step of the LES model  $\Delta t \approx 2 \text{ s}$  and the total simulation time  $1000 \text{ s}$ .  $X_{CC}$  stands for the number of chemical components and  $\Delta X_{PV}$  for the change in the change in the number of prognostic variables.

| Run | $X_{CC}$                                                                     | $\Delta X_{PV}$ | Aerosol processes    | H <sub>2</sub> O advection | $\Delta t_{SALSA}$ | Change in the computational time (%) |
|-----|------------------------------------------------------------------------------|-----------------|----------------------|----------------------------|--------------------|--------------------------------------|
| 1   | H <sub>2</sub> SO <sub>4</sub>                                               | 35              | -                    | yes                        | $\Delta t$         | + 390                                |
| 2   | H <sub>2</sub> SO <sub>4</sub>                                               | 25              | -                    | no, ZSR method             | $\Delta t$         | + 530                                |
| 3   | H <sub>2</sub> SO <sub>4</sub>                                               | 35              | coagulation          | yes                        | $\Delta t$         | + 780                                |
| 4   | H <sub>2</sub> SO <sub>4</sub>                                               | 35              | nucleation           | yes                        | $\Delta t$         | + 430                                |
| 5   | H <sub>2</sub> SO <sub>4</sub>                                               | 35              | dry deposition (Z01) | yes                        | $\Delta t$         | + 410                                |
| 6   | H <sub>2</sub> SO <sub>4</sub>                                               | 35              | dry deposition (P10) | yes                        | $\Delta t$         | + 410                                |
| 7   | H <sub>2</sub> SO <sub>4</sub>                                               | 35              | condensation         | yes                        | $\Delta t$         | + 400                                |
| 8   | H <sub>2</sub> SO <sub>4</sub> , OC                                          | 45              | condensation         | yes                        | $\Delta t$         | + 510                                |
| 9   | H <sub>2</sub> SO <sub>4</sub> , OC, HNO <sub>3</sub>                        | 55              | condensation         | yes                        | $\Delta t$         | + 600                                |
| 10  | H <sub>2</sub> SO <sub>4</sub> , OC, HNO <sub>3</sub> , NH <sub>3</sub>      | 65              | condensation         | yes                        | $\Delta t$         | + 820                                |
| 11  | H <sub>2</sub> SO <sub>4</sub> , OC, HNO <sub>3</sub> , NH <sub>3</sub> , BC | 75              | all                  | yes                        | $\Delta t$         | + 1370                               |
| 12  | H <sub>2</sub> SO <sub>4</sub> , OC, HNO <sub>3</sub> , NH <sub>3</sub> , BC | 75              | all                  | yes                        | $2\Delta t$        | + 1130                               |
| 13  | H <sub>2</sub> SO <sub>4</sub> , OC, HNO <sub>3</sub> , NH <sub>3</sub> , BC | 75              | all                  | yes                        | $10\Delta t$       | + 810                                |

Each  $n_{i,j}$ ,  $m_{c,i}$  and gaseous compound introduces a new prognostic variable that is transported by the flow in PALM. Increasing the number of prognostic variables  $X_{PV}$  from the default value of  $X_{PV} = 6$  (wind components  $u$ ,  $v$ ,  $w$  and scalars  $e$ ,  $\theta$  and  $q$ ) to

$$X_{PV} = 6 + \Delta X_{PV} = 6 + X_B(X_{CC} + 1) + X_G, \quad (12)$$

where  $X_B$  is the number of size bins,  $X_{CC}$  the total number of chemical components (aerosol-phase) and  $X_G = 5$  the total number of gaseous compounds, increases the computational load tremendously. To estimate the increase in computational costs caused by significantly increasing  $X_{PV}$ , [and also resolving the aerosol dynamics](#), simulations over a simple test domain of  $20 \text{ m} \times 20 \text{ m} \times 20 \text{ m}$  (See SI, Fig. S1) were conducted with varying set-ups for SALSA.

- 10 The relative changes in computational load per simulation are given in Table 2. Adding  $X_B = 10$  size bins composed of  $X_{CC} = 2$  chemical components (water always present) introduces  $\Delta X_{PV} = 35$  new prognostic variables and increases the original computational time by nearly a factor of four (run 1). Calculating the aerosol water content at each  $\Delta t_{SALSA}$  instead of treating it as prognostic variables is even more demanding (run 2). Of all aerosol dynamic processes, coagulation is the most expensive (run 3). Including more chemical components further increases the computational time (run 8–13), which can

be however notably decreased by lengthening  $\Delta t_{\text{SALSA}}$  (run 12–13). Considering the longer time scales of aerosol dynamic processes compared to dispersion (e.g. Pryor and Binkowski, 2004; Kumar et al., 2008),  $\Delta t_{\text{SALSA}} = 10\Delta t$  is considered to be reasonable in urban simulations with a grid resolution of  $\sim 1$  m and  $\Delta t \sim 0.1$ . In any case, the computational expenses are multiplied when SALSA is included, which limits the size of LES model domains to be considered.

## 5 2.5 Initialisation of the aerosol number and mass size distribution

The initial aerosol size distribution is defined by setting the number concentration of particles in each bin  $n_i$  of which the volume  $v_{c,i}$  and mass concentrations  $m_{c,i}$  are calculated based on the geometric mean diameter  $\overline{D}_i$ . Aerosol emissions are defined similarly. In other words, the total number concentration is preserved in the initialisation whereas uncertainties arise when estimating  $m_{c,i}$  or  $v_{c,i}$ .

- 10 Limiting  $X_B$  in a sectional aerosol module is a simple method to reduce computational costs and memory demand. However, this results in an inevitable loss in accuracy as the aerosol size range covers many orders of magnitude from few nanometres to several micrometres. To test the sensitivity of the representation of the aerosol number and mass size distribution to  $X_B$ , four different configurations are tested (Fig. 2). All configurations cover particles from 3 nm to 2.5  $\mu\text{m}$  and the subrange 1 includes particles up to 10 nm. The default configurations contains  $X_B = 10$  with two bins in the subrange 1. The second
- 15 configuration contains  $X_B = 8$  and only one bin in the subrange 1, whereas the third configuration contains two additional bins in the subrange 2 when compared to the default configuration. Additionally, an ideal configuration with  $X_B = 50$  was tested.

The total aerosol particle volume concentration  $V$  is highly sensitive to  $X_B$  and the rate of overestimation increases with a decreasing  $X_B$  (Fig. 2). Overestimating particle volume causes errors in, for instance, calculating the coagulation kernel, gas-to-particle mass transfer and deposition velocity. Furthermore, the ability of a sectional module to capture narrow features

20 in a size distribution (e.g. in Fig. 2c) improves with higher  $X_B$ . To compromise between computational costs and modelling accuracy,  $X_B = 10$  is used in this evaluation study.

## 3 Model evaluation set-up

### 3.1 Case description

Performance of SALSA module in PALM is evaluated against measurements on the vertical variation of the aerosol number size distribution and concentrations in a street-canyon (Pembroke Street) in central Cambridge, United Kingdom, over consecutive

25 24 hours on March 20–21, 2007 (Kumar et al., 2008, 2009). During the measurement campaign, the predominant wind direction (WD) was from northwest and perpendicular to the street canyon. Furthermore, there is a large pedestrian area upwind of the site with no traffic emissions, and hence emissions from adjacent streets unlikely affected the measurements. The building height is around 14–18 m on the upwind and 11–15 m on the downwind side of the street canyon (Fig. 3).

- 30 Aerosol size distributions in the size range  $D = 5\text{--}2738$  nm were measured pseudo-simultaneously at four heights ( $z = 1.00, 2.25, 4.62$  and  $7.37$  m above ground level (AGL)) ~~on the northwestern side of Pembroke street~~ using a fast-response differ-

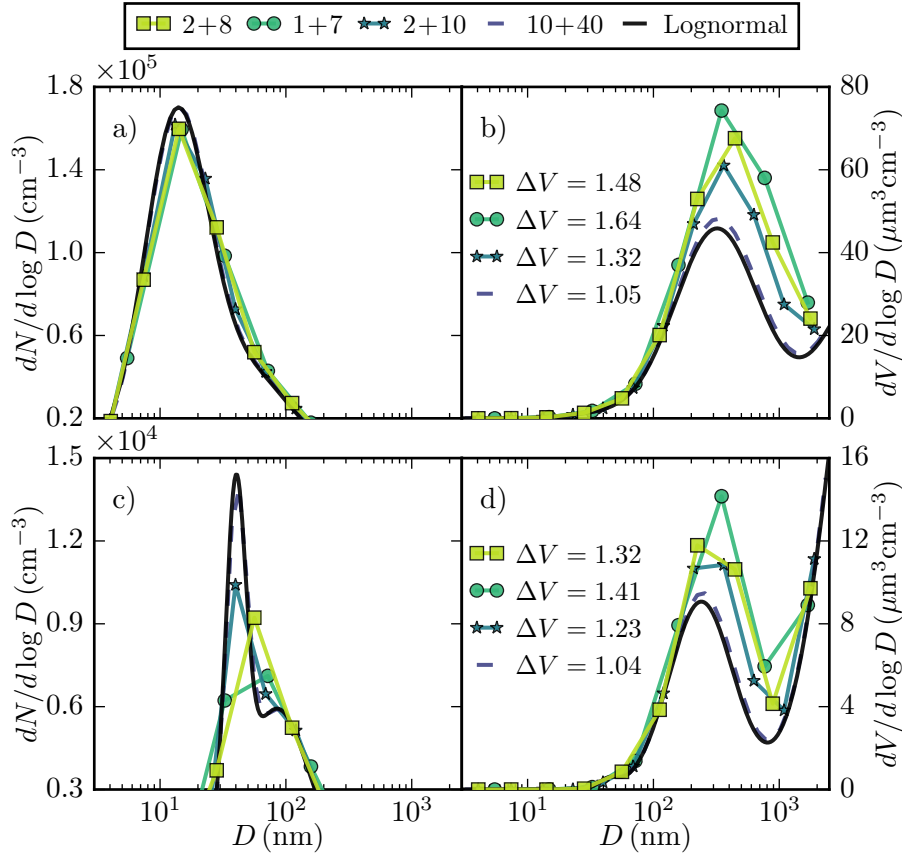

**Figure 2.** A sectional representation of the aerosol number  $dN/d\log D$  ( $\text{cm}^{-3}$ ) (a and c) and volume  $dV/d\log D$  ( $\mu\text{m}^3 \text{cm}^{-3}$ ) (b and d) size distribution as a function of particle diameter  $D$  (nm) in SALSA for typical polluted urban (a–b) and hazy rural conditions (c–d) (Zhang et al., 1999). Top legend: [number of size bins in the subrange 1] + [number of size bins in the subrange 2]. The continuous log-normal size distribution is given with a solid black line.  $\Delta V$  is the total volume concentration relative to the continuous log-normal size distribution.

ential mobility spectrometer (DMS500). [The measurement location was on the northwestern side of Pembroke street around 66 m from the closest intersection in the southwest.](#) Traffic volumes along the street were simultaneously measured. Moreover, 30-minute-averaged meteorological data, including wind speed ( $U$ ) and direction, ambient air temperature ( $T$ ) and relative humidity (RH), were measured 40 m AGL at some 500 m from the sampling site. For more information on the measurements, refer to Kumar et al. (2008).

The evaluation is done for three different periods: 8.30–9.30 am (morning), 9.00–10.00 pm (evening) and 3.00–4.00 am (night-time). No daytime evaluation is presented here in order to minimize the role of thermal and vehicle-induced (VIT) turbulence on pollutant transport. The evening and night-time periods represent time after sunset while the morning measurements were conducted under partly cloudy conditions.

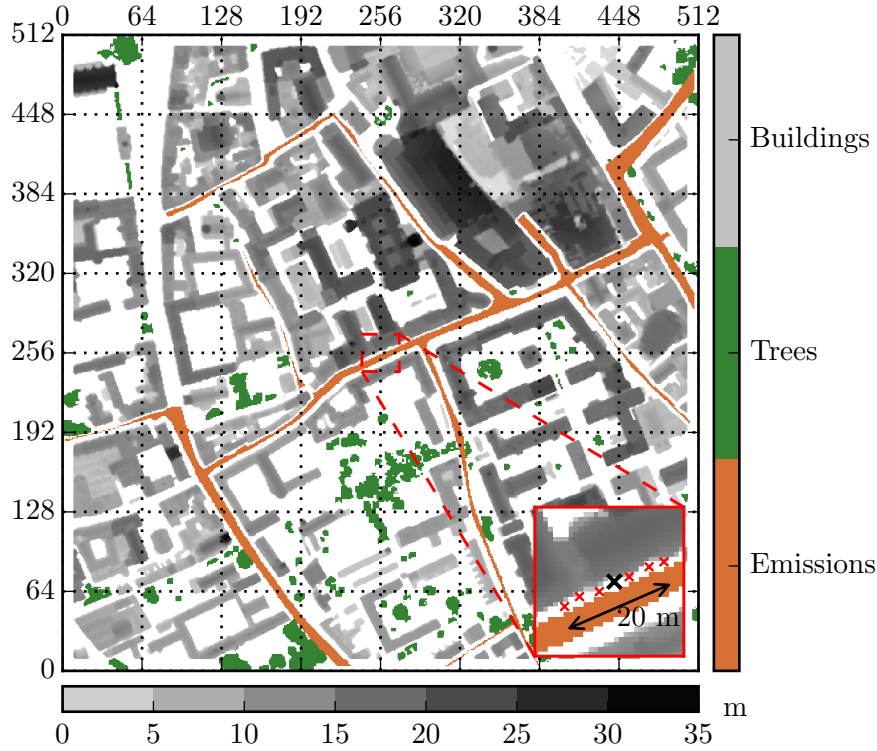

**Figure 3.** Visualisation of the simulation domain. The building height (m) is shown in colors of grey, and the location of trees and emissions in green and copper, respectively. The evaluation domain is marked with a red square. Red crosses in the zoomed figure indicate the horizontal black cross indicates the measurement location and the red crosses the additional points at which the model output is evaluated against measurements. The grid shows the horizontal model grid. Data sources: elevation maps – Environment agency (UK) data archive; land use footprints – Ordnance Survey 2014.

### 3.2 Model domain and morphological data

Simulations are conducted over a domain of  $512 \times 512 \times 128$  grid box with the measurement site approximately at the centre of the domain (Fig. 3). A uniform grid spacing of  $\Delta_{x,y,z} = 1.0$  m is applied within the lowest 96 m, and above the vertical grid  $\Delta_z$  is stretched by a factor of 1.04, resulting in a total domain height of around 164 m and a maximum  $\Delta_{z,\max} \approx 3.5$  m.

- 5 The building-height and vegetation maps for the study area were constructed from 1-m horizontal resolution digital surface (DSM) and terrain (DTM) models (Environment agency UK data archive) following Kent et al. (2018). First, the DTM was subtracted from the DSM to set the terrain height to zero. Next, buildings were separated from other surface elements using a building footprint dataset of the OS MasterMap® Topography Layer (Ordnance Survey 2014). Vegetation map was formed from the remaining pixels by first removing the residue pixels around buildings and then performing dilation of the raster map to
- 10 remove holes and unify vegetated areas. Only vegetation elements higher than  $z_{v,\min} = 4.0$  m were included in the simulations.

They were modelled as springtime, deciduous broadleaf trees, with a constant ~~leaf-area-density~~ LAD =  $0.6 \text{ m}^2 \text{ m}^{-3}$  from  $z_{v, \min}$  to the tree top. [This LAD value was estimated as a lower limit for urban street trees in Northern Europe in spring \(Gillner et al., 2015\).](#) Excluding the details of local vegetation is acceptable since there are no trees close to the measurement site and overall the amount of vegetation is low.

5 Only road traffic lanes are defined as source areas for aerosol particles and gaseous compounds. The emission map (Fig. 3) was created by first extracting the roads, tracks and paths from the OS MasterMap® Topography Layer, and then manually removing pedestrian areas and small streets. Finally, raster erosion was applied to the remaining map to result in a lane width of 6–7 m on Pembroke street.

### 3.3 Pollutant boundary conditions: emissions and background concentrations

**Table 3.** Emission factors (EF) applied in the simulations for all gaseous compounds and aerosol number  $n$ .

|    | H <sub>2</sub> SO <sub>4</sub>              | HNO <sub>3</sub> | NH <sub>3</sub>      | NVOC | SVOC                 | $n$                                       |
|----|---------------------------------------------|------------------|----------------------|------|----------------------|-------------------------------------------|
|    | (g km <sup>-1</sup> vehicle <sup>-1</sup> ) |                  |                      |      |                      | (km <sup>-1</sup> vehicle <sup>-1</sup> ) |
| EF | $2.5 \times 10^{-4}$                        | 0.0              | $4.2 \times 10^{-2}$ | 0.0  | $2.5 \times 10^{-3}$ | $1.33 \times 10^{14}$                     |

10 In the simulations, a total aerosol number emission factor  $EF_n = 1.33 \times 10^{14} \text{ km}^{-1} \text{ vehicle}^{-1}$  is used (Table 3), which is an estimate specific to the measurement site (Kumar et al., 2009).  $EF_n$  was distributed to a representative aerosol number size distribution with the shape estimated from the measured size distribution at the lowest level  $z = 1.0 \text{ m}$  during each simulation time (see SI, Sect. S3). Aerosol emissions are assumed to be composed of mainly black (48%) and organic carbon (48%), and some H<sub>2</sub>SO<sub>4</sub> (4% of the total mass) (Maricq, 2007; Dallmann et al., 2014). Emission factors of gaseous compounds, instead, are  
15 calculated using the fleet weighted road transport emission factors for 2008 by the National Atmospheric Emissions Inventory (NAEI, Walker, 2011) and the following fleet composition: 75 % petrol and 19 % diesel passenger cars, 1 % buses, 3 % light and 1 % heavy duty diesel vehicles, and 1 % motorcycles. Since no  $EF_{H_2SO_4}$  or  $EF_{SVOC}$  is given by NAEI, the following estimates were applied:  $EF_{H_2SO_4} = 0.1 EF_{SO_2}$  (Arnold et al., 2006, 2012; Miyakawa et al., 2007) and  $EF_{SVOC} = 0.01 EF_{NMOG}$  (Zhao et al., 2017), where NMOG stands for non-methane organic gases. The latter is a rather conservative compared to emission  
20 rates applied by Albriet et al. (2010) for a light duty diesel truck. Both aerosol and gaseous emissions are introduced as constant fluxes per unit area.

The background aerosol particle number and trace gas concentrations are produced with the trajectory model for Aerosol Dynamics, gas and particle phase CHEMistry and radiative transfer (ADCHEM, Roldin et al., 2011). Similar to Öström et al. (2017), ADCHEM was operated as a one-dimensional column trajectory model along HYSPLIT (Stein et al., 2015) air mass  
25 trajectories. In total, the gas- and aerosol particle composition were simulated along 48 trajectories arriving to central Cambridge between March 20 at 00:00 and March 21 at 23:00 (one every hour). All air mass trajectories started 5-days upwind Cambridge over the Arctic ocean (see ~~SI~~-Fig. S5). The anthropogenic trace gas emissions along the trajectories were taken

from the European Monitoring and Evaluation Programme (EMEP) emission inventory for 2007 and the size resolved primary particle emissions from the global emission inventory from Paasonen et al. (2016). These vertical profiles of the background concentrations (SI, Sect. S5) are introduced to the simulation domain by a decycling method, in which the constant background concentrations are fixed at the lateral boundaries.

5   **3.4   Flow boundary conditions**

**Table 4.** Prevailing wind speed  $U$ , air temperature  $T$  and relative humidity RH at  $z = 40$  m AGL, the applied external pressure gradient force and traffic rates for each simulation hour. Wind direction is always from ~~northeast~~northwest ( $WD = 315^\circ$ ).

| Simulation | $U$ (m s <sup>-1</sup> ) | $T$ (K) | RH (%) | Pressure gradient in<br>$x, y$ -directions (Pa m <sup>-1</sup> ) | Traffic rate<br>(veh hour <sup>-1</sup> ) |
|------------|--------------------------|---------|--------|------------------------------------------------------------------|-------------------------------------------|
| Morning    | 4.30                     | 277     | 64     | -0.00630, 0.00630                                                | 895                                       |
| Evening    | 3.94                     | 274     | 90     | -0.00515, 0.00515                                                | 380                                       |
| Night      | 2.24                     | 272     | 93     | -0.00164, 0.00164                                                | 306                                       |

In all simulations, a neutral atmospheric stratification is assumed for simplicity as no information on the atmospheric stratification nor boundary layer height was available. Thus, a constant  $\theta = T(z = 40 \text{ m})$  (Table 4) is applied throughout the domain. The flow is driven by an external pressure gradient force above  $z = 120$  m. The gradient was set so that the horizontal mean  $U$  ( $z = 40$  m) over the whole simulation domain equals ( $\pm 0.1 \text{ m s}^{-1}$ ) the measured  $U$  (Table 4; see Fig. S7 in SI for vertical profiles). Furthermore, a domain height ~~of was~~ 164 m ~~was set~~ for all simulations. This is  $> 13h$ , where  $h = 12.08$  m is the mean building height over the domain, which should be enough to correctly resolve the small-scale turbulent structures within the urban canopy (Coccal et al., 2006).

10

Cyclic lateral boundary conditions are applied for the flow,  $q$  and  $e$ , which is reasonable since the surroundings do not notably differ from the simulation domain. A Neumann (free-slip) boundary condition is applied at the top boundary and also

15

at the bottom and top for all scalars. The roughness height is  $z_0 = 0.05$  m (Letzel et al., 2012) and the drag coefficient applied for the trees  $C_D = 0.5$  (see Kent et al., 2017, and references within).

**3.5   Simulations**

Baseline simulations used to evaluate the performance of the model in the morning, evening and at night are conducted with the default number of aerosol size bins  $X_B = 2 + 8$  (see Sect. 2.5). All aerosol processes, except nucleation, are switched on,

20

and the following chemical components are included:  $\text{H}_2\text{SO}_4$ , OC, BC,  $\text{HNO}_3$  and  $\text{NH}_3$ . All aerosol particle are assumed to be internally mixed and hygroscopic, and thereby no subrange 2b was applied.

In addition to the base run, the sensitivity to different aerosol processes and the number of size bins  $X_B$  was examined for the morning simulation. Firstly, the following four simulations with  $X_B = 2 + 8$  are conducted: no aerosol processes (NOAP),

only coagulation (COAG), only dry deposition (scheme Z01) on solid surfaces and vegetation (DEPO), and only condensation (COND). In the first three, particles are assumed to constitute only of OC in order to limit computational costs, given that coagulation and dry deposition do not depend on the aerosol composition. COND, instead, is performed with an identical set-up as the baseline simulation, except that other processes were switched off. Secondly, the sensitivity to  $X_B$  is tested by replicating the baseline morning simulation with less  $X_B = 1 + 7$  (LB) and more bins  $X_B = 2 + 10$  (MB).

The advection of both momentum variables and scalars was based on the 5th-order advection scheme by Wicker and Skamarock (2002) together with a third-order Runge-Kutta time stepping scheme (Williamson, 1980). The pressure term in the prognostic equations for momentum was calculated using the iterative multigrid scheme (Hackbusch, 1985). In order to enable similar flow conditions for all simulations, feedback to PALM was switched off, i.e. changes in specific humidity due to condensation of water on aerosol particles were not allowed. Therefore  $q$  also remained constant. Here  $\Delta t_{\text{SALSA}} = 1.0$  s in all simulations, which is a safe choice since the turbulence time scale is smaller than any aerosol process time scale (Kumar et al., 2008).

Simulations were conducted with the PALM model revision 3125. This was a model version prior to the 6.0 release, but reproducibility with version 6.0 was ensured by repeating the NOAP simulation. All simulations were first run for two hours to create a quasi-stationary state of the flow, after which SALSA was switched on and run for 70 minutes. Data output was collected within the last 60 minutes with a 0.5–1 Hz frequency. Simulations were performed on the Centre for Scientific Computing (CSC) Taito supercluster. Using  $64 \times 64$  Intel Haswell processor cores, one 70-minutes-long simulation with SALSA required between 17 h (NOAP) and 52 h (MB) computing time.

## 4 Results

Modelled aerosol number concentrations were compared against measurements at ~~eight~~the measurement location and also six additional horizontal points on the northern side of the street canyon within the evaluation domain of  $30 \text{ m} \times 30 \text{ m}$  (Fig. 3). ~~All eight~~Additional six profiles were analysed to include the possible error in defining the measurement location and also to illustrate the variation in concentrations at different adjacent points in a street canyon. In the evaluation, the modelled values were linearly interpolated to the measurement heights and the measured size distributions to the modelled size bins.

All modelled and measured values are hourly averaged. ~~Statistical analysis of the model is not conducted as it would not be statistically representative with the small amount of data points available for evaluation.~~

### 4.1 Baseline simulations

To give a general picture of aerosol particle concentrations and dispersion in this study, Fig. 4 illustrates the modelled total aerosol number concentrations  $N_{\text{tot}}$  and wind speed  $U$  at  $z = 3.5$  m AGL for all baseline simulations. The horizontal distribution of  $N_{\text{tot}}$  is shown to follow that of emissions (see Fig. 3) and, for instance, courtyards remain relatively clean. Nevertheless, wind controls the dispersion, which is seen as up to 70 % higher  $N_{\text{tot}}$  inside the street canyons for the calmer night-time



compared to the more windy evening simulation (see Fig. S7 in SIS8) despite the lower emission rates at night. Interestingly, pollutant accumulation occurs close by the measurement site within the evaluation domain.

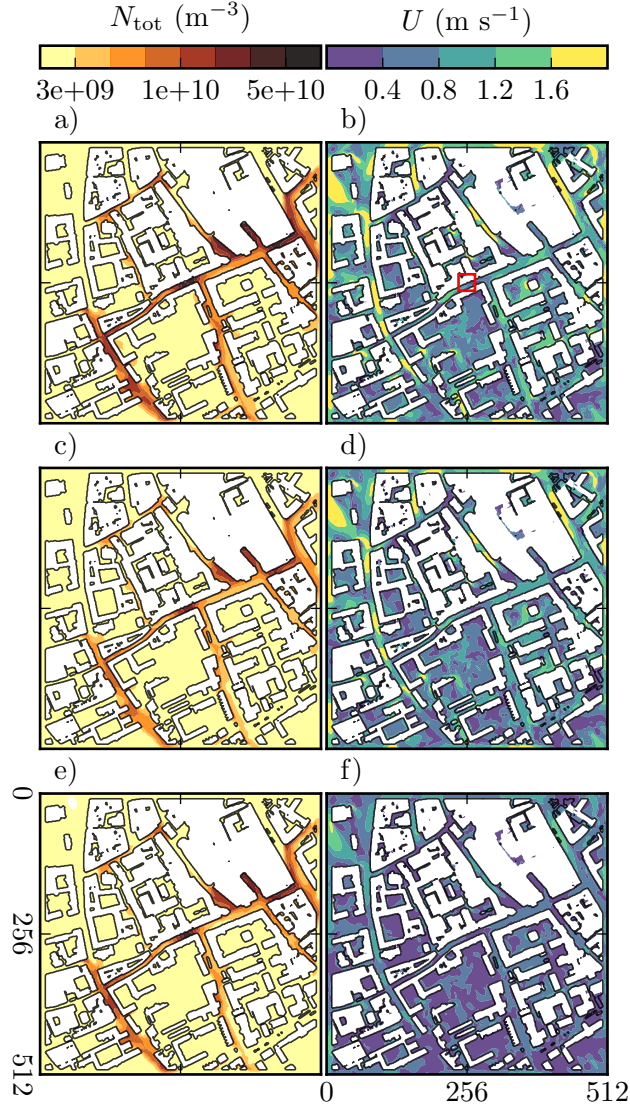

**Figure 4.** Total aerosol number concentration  $N_{\text{tot}}$  ( $\text{m}^{-3}$ , left column) and wind speed  $U$  ( $\text{m s}^{-1}$ , right column) at  $z = 3.5$  m for the morning (a, b), evening (c, d) and night-time simulation (e, f) over the whole simulation domain of  $512 \text{ m} \times 512 \text{ m}$ . Evaluation domain (see Fig. 3) is marked with a red square in b).

The modelled mean vertical profiles of  $N_{\text{tot}}$  ( $\text{m}^{-3}$ ) at all eight horizontal points  $N_{\text{tot}}$  compare well against the measured values (Fig. 5). Despite the slight overestimation especially in the morning. Indeed, also the additional six profiles are generally

within the factor of two of observations (see Fig. S9). The rate of change of  $N_{\text{tot}}$  in vertical is correctly modelled except for a measured increase in concentrations within the lowest 2 m. Despite the modelled  $N_{\text{tot}}$  being 50–100 % higher than the measured in the evening (Fig. 5b), concentrations are in the same order of magnitude. Furthermore, the variation between This deviation from measurements is comparable to typical differences in measured aerosol number concentrations with different instruments (Ankilov et al., 2002; Hornsby and Pryor, 2014). Comparing the mean values of all eight modelled profiles is larger than the variation between their mean value and measured  $N_{\text{tot}}$ . The rate of change of seven modelled profiles, their variation is shown to be larger than that between the measured and modelled  $N_{\text{tot}}$  in vertical is correctly modelled except for a measured increase in concentrations within the lowest 2 at the exact measurement location.

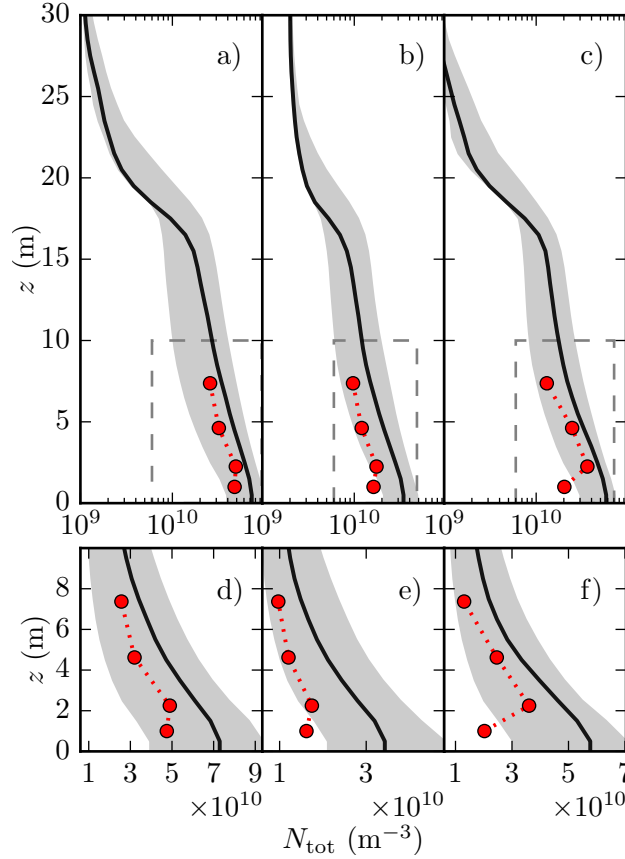

**Figure 5.** Measured (red dashed circles with a dotted line) and modelled (black solid line and grey shaded area) vertical profiles of total aerosol number concentration  $N_{\text{tot}}$  ( $\text{m}^{-3}$ ) for the morning (a and d)–morning, evening (b and e)–evening and night-time (c and f)–night-time simulation. The bottom panel shows  $N_{\text{tot}}$  in the lowest 10 m (area marked with a black dotted line in the top panel figures) using a linear scale on the x-axis. The black solid line shows the mean vertical profile at the measurement location and the grey shaded area shows the range of the mean vertical profiles 1–8 at six additional evaluation points within the evaluation domain and the solid line their mean value.

The ~~Naturally, the~~ coarse sectional representation ~~of the aerosol size distribution~~ with  $X_B = 10$  means some details, such as ~~the a~~ drop in concentrations at  $D \approx 60$  nm ~~, cannot be always (Fig. 6), cannot always be~~ captured by the model (Fig. 6). Furthermore, ~~omitting any emission sources can produce error. For instance, an underestimation of the number of particles larger than 20 nm is underestimated at  $z = 2.25$  m and  $z = 4.62$  m in the night-time simulation at  $z = 2.5$  m and  $z = 4.5$  m~~ (Fig. 6b and c) ~~, which could stem from omitting some emissions elevated from the surface excluding some elevated sources, such as tail-pipes tail-pipe emissions of trucks. Overall, the modelled~~ Nonetheless, the model predictions are mainly within the factor of two of measurements (see Fig. S10). The size distributions display very similar shapes to ~~the emission size distributions that of emissions,~~ showing that the result is very sensitive to the quality of the input emission data.

Moreover, ~~as the LES technique lacks reliability close to the walls~~ At the same time, a mismatch with the measurements near the surface is to be expected, ~~as the LES technique lacks reliability close to the walls.~~ Maronga et al. (2015), for instance, showed that the turbulent flow over a homogeneous surface is not well-resolved for the lowest six grid points, which corresponds to the lowest 5 m in these simulations. In that context, the modelled concentration fields agree exceptionally well with the measurements.

## 4.2 Sensitivity tests

### 4.2.1 Role of different aerosol processes

In the temporal and spatial scales applied in the simulations, dry deposition changes the total aerosol number concentrations most, with a relative difference  $\Delta N_{\text{tot}} < -20$  % especially in areas with vegetation but also in the wake of buildings (Fig. 7). Coagulation (COAG) changes  $N_{\text{tot}}$  only by less than 1 %. The impact of condensation and dissolutional growth (COND) on  $N_{\text{tot}}$  is negligible, as expected, since condensation only grows particles (Kumar et al., 2011).

Neglecting all aerosol processes overestimates  $N_{\text{tot}}$  (see Fig. 7a S11), and therefore including dry deposition ~~in the model~~ is essential for ~~modelling realistic  $N_{\text{tot}}$  shown as the agreement with measurements (Fig. 7d and e).~~ Above the roof level ( $z \gtrsim 15$  m), the role of dry deposition starts to weaken (Fig. 8), which is also attributable to lower aerosol concentrations. Smallest aerosol particles are most strongly affected by the aerosol processes independently from the modelling height (Fig. 9): This is because more efficient Brownian diffusion leads to higher deposition velocities  $v_d$  (see Fig. 1) and coagulation rates.

Furthermore, smallest particles grow by condensation and dissolutional growth, which instead leads to less efficient removal by dry deposition. The impact of dry deposition and, to less extent, coagulation, decrease with height, and above the roof level the observed  $\Delta N_{\text{tot}}$  is likely due aerosol processes acting upwind of the measurement site.

While condensation and dissolutional growth do not directly affect the number concentrations, the total mass and chemical composition of aerosol particles are shown to change. Over the whole evaluation domain, condensation and dissolutional growth increase  $\text{PM}_{\text{tot}}$  by over 10 % below the roof height (Fig. 10). Comparing the initial chemical composition of the background aerosol concentrations and emissions (Table 5) with the modelled composition shows that especially the mass fraction of nitrates has increased, from 0 to 8 %. This increased particulate mass of nitrates originates solely from condensation of background gaseous  $\text{HNO}_3$  as there are no traffic related emissions of gaseous  $\text{HNO}_3$ . The simulated mass fraction of BC

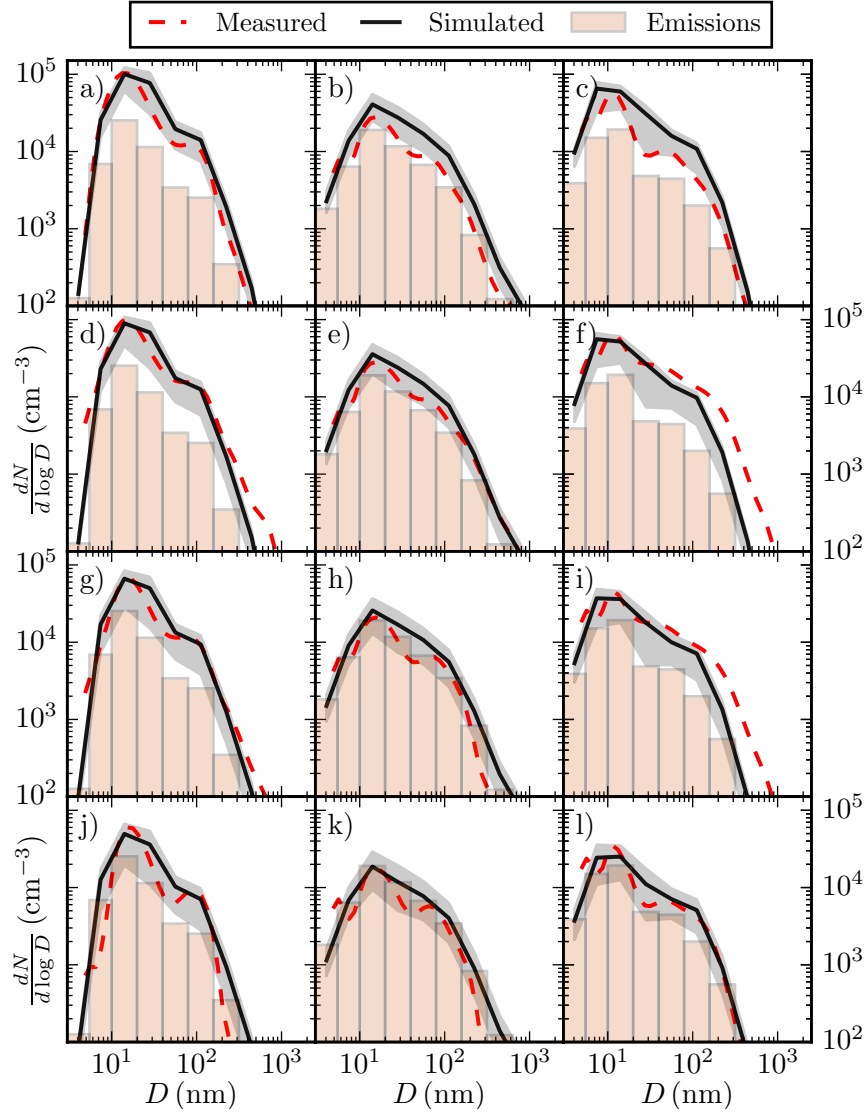

**Figure 6.** Measured (red dashed line) and simulated (black lines) aerosol number size distribution  $dN/d\log D$  ( $\text{cm}^{-3}$ ) as a function of particle diameter  $D$  (nm) in the morning (first column: a, d, g, j), evening (second column: b, e, h, k) and at night (third column: c, f, i, l) at levels  $z = 0.51.00, 2.52.25, 4.54.62$  and  $7.57.37$  m (top to bottom). The shape of the number size distribution for the emissions is given with bars (not in units  $\text{cm}^{-3}$ ). The black solid line shows the mean value at the measurement location and the grey shaded area shows the range of the horizontal mean values at six additional evaluation points 1–8 within the evaluation domain and the line their mean value.

is very close to that of the aerosol emissions, while other mass fractions that also change due to condensation and dissolutional growth vary more. Deposition decreases  $\text{PM}_{\text{tot}}$  but the relative change is clearly lower than for  $N_{\text{tot}}$  as smallest particles, which are most affected by dry deposition, represent only a tiny share of the total mass.

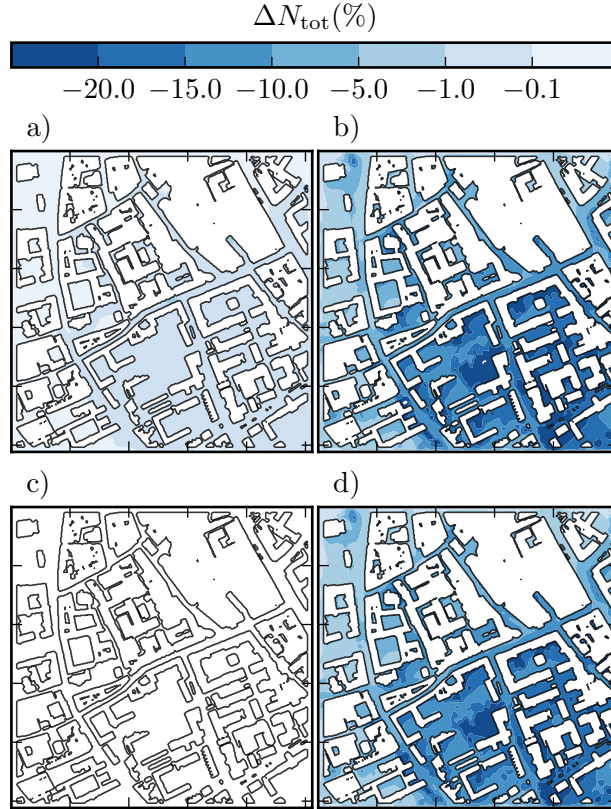

**Figure 7.** Relative difference in the total aerosol number concentration  $\Delta N_{\text{tot}}$  (%) at  $z = 3.5$  m compared to NOAP for the a) COAG, b) DEPO, c) COND and d) baseline simulation in the morning.

**Table 5.** Mass fractions of different chemical compounds for the aerosol background, emissions and simulated concentrations for the COND simulation. The values are averaged over the whole evaluation domain within  $z < 30$  m.

|                 | $\text{SO}_4^{2-}$ | OC   | BC   | $\text{NO}_3^-$ | $\text{NH}_4^+$ |
|-----------------|--------------------|------|------|-----------------|-----------------|
| Background      | 0.09               | 0.24 | 0.64 | 0.0             | 0.03            |
| Emission        | 0.04               | 0.48 | 0.48 | 0.0             | 0.0             |
| Simulated: COND | 0.05               | 0.36 | 0.49 | 0.08            | 0.01            |

#### 4.2.2 Number of size bins

Further decreasing the number of aerosol size bins  $X_B$  is a tempting method in order to reduce the computational load. Indeed, the total CPU time is reduced by -24 % when  $X_B = 1 + 7$  (LB), while setting  $X_B = 2 + 10$  (MB) increases the CPU time

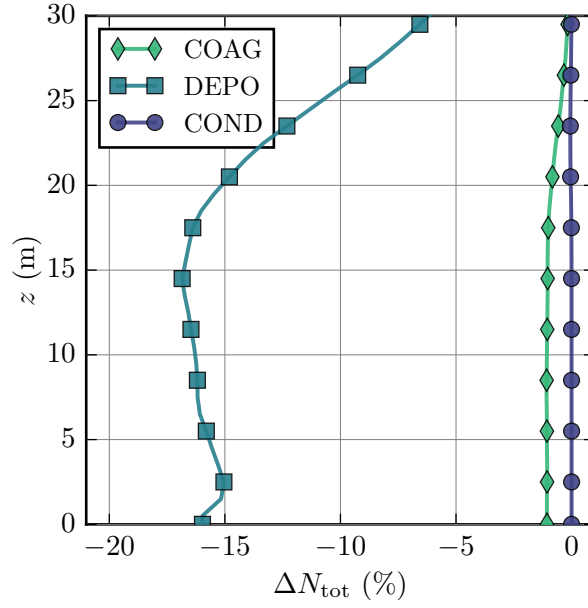

**Figure 8.** Measured (red-dashed line) and simulated Relative difference in the vertical profiles-profile of the total aerosol number concentration  $N_{\text{tot}} (\text{m}^{-3})$  for the a)  $\Delta N_{\text{tot}} (\%)$  compared to NOAP (grey-solid line), b) simulation for: COAG (diamonds) and c) DEPO (squares) and d) COND (circles) simulation-simulations in the morning. Relative-The difference  $\Delta N_{\text{tot}} (\%)$  of b)-d) to a) is shown in e). The grey shaded area shows the range of the mean-vertical-profiles 1-8 within the averaged over all seven evaluation domain-and the line their mean valuepoints.

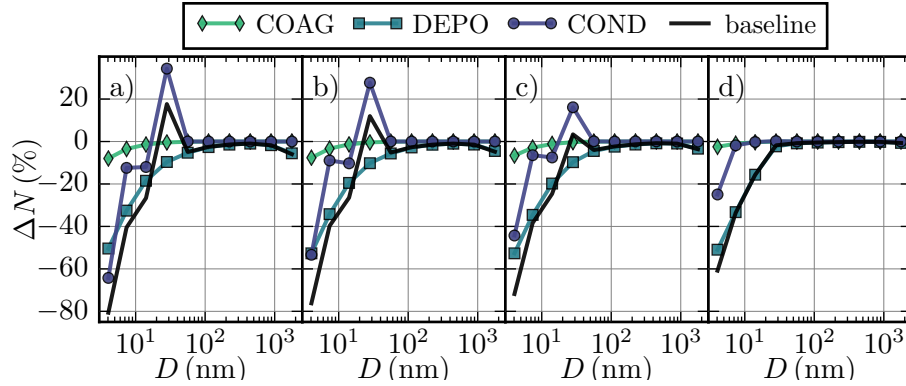

**Figure 9.** Relative difference in the aerosol number concentration  $\Delta N (\%)$  compared to NOAP as a function of aerosol particle diameter  $D (\text{nm})$  at levels a)  $z = 3.5 \text{ m}$ , b)  $z = 10.5 \text{ m}$ , c)  $z = 20.5 \text{ m}$  and d)  $z = 40.5 \text{ m}$  in the morning. The difference is averaged over all seven evaluation points.

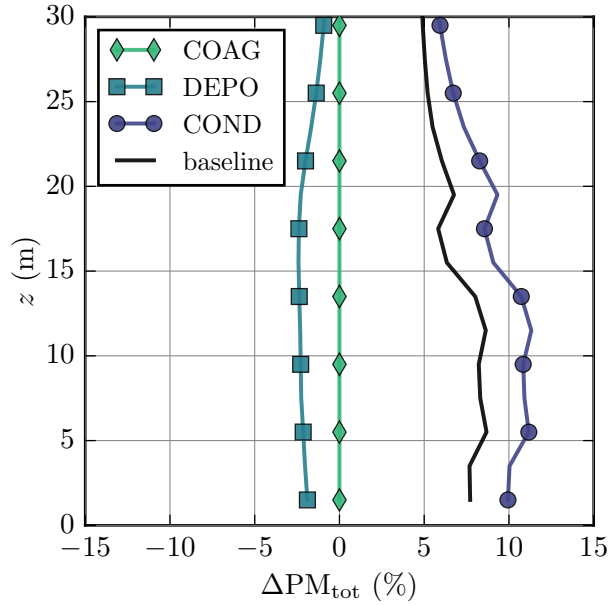

**Figure 10.** Relative difference in particulate mass  $\Delta PM_{2.5}(\%)$   $\Delta PM_{tot}(\%)$  compared to NOAP for COAG, DEPO, COND and the baseline simulation within the whole evaluation domain in the morning.

by +18 % compared to the baseline simulation in the morning. However, as shown in Sect. 2.5 and Fig. S8 (see SB S12), the capability to describe the details in the aerosol size distribution drops rapidly when decreasing  $X_B$ .

Despite the background  $N_{tot}$  and total aerosol number emissions  $EF_n$  being equal for the baseline, LB and MB simulations, modelled  $N_{tot}$  are not equal (Fig. 11). The difference is entirely attributable to the dissimilar effectiveness of aerosol processes with lower (LB) and higher (MB) level of detail in representing the aerosol size distribution. Interestingly, using less size bins (LB) has a very minor impact on the horizontal field of  $N_{tot}$  while more bins (MB) results in  $|\Delta N_{tot}| > 5$  %. This is still smaller than  $\Delta N_{tot}$  due to deposition.

Comparing the modelled particulate masses is not that straightforward and is thus not represented here. Already the background concentrations and emissions of particulate mass differ between the simulations because the mass size distribution is calculated from the sectional number size distribution which is different for all simulations.

## 5 Discussion and conclusions

This article represents a novel, high-resolution, LES-based urban aerosol model that resolves the aerosol particle concentrations, size distributions and chemical compositions at spatial and temporal scales of 1.0 m and 1.0 s for entire neighbourhoods.

An evaluation study ~~shows good agreement against measurements~~ on the vertical variation of the aerosol number size distribution and total number concentration in a simple street canyon in central Cambridge, UK, shows good agreement against

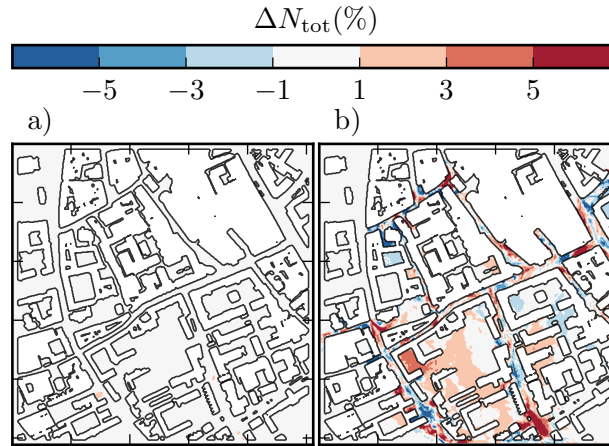

**Figure 11.** Relative difference in the total number concentration  $\Delta N_{\text{tot}}$  (%) at  $z = 3.5$  m compared to the baseline simulation for the a) LB and b) MB simulation in the morning.

measurements. The model can predict the dilution of concentrations in vertical as well as the number of aerosol particles in different size bins well generally within a factor of two of observations. The spatial distribution of aerosol concentrations is mostly determined by the flow and emissions. When As regards the individual impact of aerosol dynamic processes, dry deposition is shown to decrease local number concentrations by over 20 %, which is, nonetheless, at the lower end of  $\Delta N_{\text{tot}} =$   
 5  $[-35, -15]$  % estimated by Huang et al. (2014) for an open space with traffic. Coagulation, instead, has a very minor impact, which agrees with previous timescale analyses (Kumar et al., 2009; Zhang et al., 2004) and CFD modelling studies (Albriet et al., 2010; Huang et al., 2014; Wang and Zhang, 2012). Condensation and dissolutional growth increase particulate mass by over 10 %. The role of aerosol dynamic processes is shown important both on number and mass especially in areas with low wind speeds, such as in the courtyards and shelters of trees. Furthermore, comparing eight adjacent six additional modelling  
 10 profiles to one measurement profile the measured one shows the limited representativeness of point measurements and gives more support on performing air quality modelling which gives also the spatial variability of concentrations.

With an increasing modelling complexity, the number of potential sources of modelling uncertainty augments. One of the largest source of uncertainty is related to the quality of the emission data. One A major reason to evaluate the aerosol model against the dataset by Kumar et al. (2008) was that mainly only emissions from Pembroke street affected the measured  
 15 concentrations the measured concentrations were mainly affected by traffic emissions along Pembroke street, which simplified the emission estimated. Modelling uncertainties in the aerosol model eased estimations. With a

Aerosol modelling uncertainties caused by simplifying assumptions and model design are discussed in detail in Kokkola et al. (2008). One of the main challenges in simulating both the aerosol number and mass also in this study is the limited number of aerosol size bins, whereas the whereas the aerosol dynamic processes have less impact. Another inevitable error in



sectional aerosol modelling is made when assuming a spherical particle shape and defining the aerosol volume from the bin mean diameter. Despite these limitations, the model simulated the observed [number](#) concentrations correctly.

Further arguments for applying the selected dataset were, in the first place, the availability of measurements on the vertical variability of aerosol number size distribution at high temporal resolution, but also the simplicity of the urban morphology at the measurement location. The influence of aerosol dynamic processes on aerosol concentration is determined by their size distribution, and thus measurements only on the total number concentration or particulate mass (e.g. Weber et al., 2006) were considered insufficient for this model evaluation. To our knowledge, there exist only a few datasets on the vertical variation of the aerosol size distribution in an urban environment (Kumar et al., 2008; Li et al., 2007; Marini et al., 2015; Quang et al., 2012; Sajani et al., 2018). Of these datasets, the measurement location of Kumar et al. (2008) in a street canyon with no urban vegetation was simple enough for the first evaluation study. Modelling individual street trees and their aerodynamic impact without exact information on the distribution of leaf area introduces another source of uncertainty for resolving the flow. Furthermore, dry deposition is strongly tree species dependent (e.g. Popek et al., 2013; Sæbø et al., 2012) and therefore sensitive to correct modelling of different species. Finally, high-resolution topography and land use information were freely available for this specific site.

At the same time, no [high-resolution](#) evaluation data for the flow were available, and therefore the modelling set-up was kept as simple as possible. Hence, the thermal and vehicle induced turbulence were excluded from the simulations. The increase in  $N_{\text{tot}}$  between  $z = 1.0 - 2.25$  m observed in the measurements could be explained by any of the two sources of turbulence. Kumar et al. (2008) argued that the increase is likely due to the more efficient dry deposition near the surface or complex dispersion pattern within the canyon caused both by topography and vehicle induced turbulence.

Keeping in mind the aforementioned uncertainties [and required computational resources](#), the presented model provides a novel and flexible tool to study, for example, how the shape, size and location of urban obstacles affect air pollutant transport and transformation [at a neighbourhood scale](#). For instance, the potential of urban vegetation to improve air quality by acting as biological aerosol filters (Beckett et al., 1998) depends on the size-dependent deposition velocity of aerosol particles, which is explicitly calculated within the model. The model can also provide information at high enough resolution to perform air pollutant exposure studies or to design a most representative air pollution monitoring network. The aerosol module SALSA can be further coupled with an online chemistry module which are both embedded in the PALM model system as so-called PALM-4U components. This will extent the applicability of the model from aerosol processes to more complex chemical processes and will allow to examine different urban processes simultaneously such as radiation or thermal comfort. [Moreover, ongoing model development aims at extending the application of the model from supercomputing environments to personal PCs in future \(Maronga et al., 2019\).](#)

*Code and data availability.* The PALM code including the sectional aerosol model SALSA can be freely downloaded from <http://palm.muk.uni-hannover.de>. The distribution is under the GNU General Public License v3. More about the code management, versioning and revision control of PALM can be found in Maronga et al. (2015). The exact version of the source code used in this study is additionally freely

available at <https://doi.org/10.5281/zenodo.2575325>. The standalone version of the SALSA model is freely available at <https://github.com/UCLALES-SALSA/SALSA-standalone/> and the input datasets at <https://doi.org/10.5281/zenodo.1565752> (Kurppa, 2018).

*Author contributions.* MK developed the model code with the support from HK, JT and BM. MK and CK prepared the morphological data and PK the evaluation data. MK, AH, MA and LJ designed the simulations and MK carried them out. MK prepared the manuscript with  
5 contributions from all co-authors.

*Competing interests.* No competing interests are present.

*Acknowledgements.* MK acknowledges Sasu Karttunen for technical support, and Basit Khan, Farah Kanani-Sühling, Renate Forkel and Sabine Banzhaf for co-operation, valuable discussions and model testing. This study was financially supported by the Doctoral Programme in Atmospheric Sciences (ATM-DP, University of Helsinki), Helsinki Metropolitan Region Urban Research Program and the Academy of  
10 Finland (181255, 277664), [trans-national project SMURBS \(www.smurbs.eu\)](https://www.smurbs.eu), [Grant Agreement no. 689443](#)) and [Helsinki metropolitan Air Quality Testbed \(HAQT\)](#).

## References

- Ackermann, I. J., Hass, H., Memmesheimer, M., Ebel, A., Binkowski, F. S., and Shankar, U.: Modal aerosol dynamics model for Europe: development and first applications, *Atmospheric Environment*, 32, 2981–2999, [https://doi.org/10.1016/S1352-2310\(98\)00006-5](https://doi.org/10.1016/S1352-2310(98)00006-5), 1998.
- Albriet, B., Sartelet, K., Lacour, S., Carissimo, B., and Seigneur, C.: Modelling aerosol number distributions from a vehicle exhaust with an aerosol CFD model, *Atmospheric Environment*, 44, 1126–1137, <https://doi.org/10.1016/j.atmosenv.2009.11.025>, 2010.
- Ankilov, A., Baklanov, A., Colhoun, M., Enderle, K.-H., Gras, J., Julanov, Y., Kaller, D., Lindner, A., Lushnikov, A., Mavliev, R., McGovern, F., Mirme, A., O'Connor, T., Podzimek, J., Preining, O., Reischl, G., Rudolf, R., Sem, G., Szymanski, W., Tamm, E., Vrtala, A., Wagner, P., Winklmayr, W., and Zagaynov, V.: Intercomparison of number concentration measurements by various aerosol particle counters, *Atmospheric Research*, 62, 177 – 207, [https://doi.org/https://doi.org/10.1016/S0169-8095\(02\)00010-8](https://doi.org/https://doi.org/10.1016/S0169-8095(02)00010-8), aerosol Number Concentration Measurement. International Workshop on Intercomparison of Condensation Nuclei and Aerosol Particle Counters, 2002.
- Antoniou, N., Montazeri, H., Wigo, H., Neophytou, M. K.-A., Blocken, B., and Sandberg, M.: CFD and wind-tunnel analysis of outdoor ventilation in a real compact heterogeneous urban area: Evaluation using “air delay”, *Building and Environment*, 126, 355–372, <https://doi.org/10.1016/j.buildenv.2017.10.013>, 2017.
- Anttila, T., Kerminen, V.-M., and Lehtinen, K. E.: Parameterizing the formation rate of new particles: The effect of nuclei self-coagulation, *Journal of Aerosol Science*, 41, 621–636, <https://doi.org/10.1016/j.jaerosci.2010.04.008>, 2010.
- Arakawa, A. and Lamb, V. R.: Computational Design of the Basic Dynamical Processes of the UCLA General Circulation Model, in: *General Circulation Models of the Atmosphere*, edited by Chang, J., vol. 17 of *Methods in Computational Physics: Advances in Research and Applications*, pp. 173–265, Elsevier, <https://doi.org/10.1016/B978-0-12-460817-7.50009-4>, 1977.
- Arnold, F., Pirjola, L., Aufmhoff, H., Schuck, T., Lähde, T., and Hämeri, K.: First gaseous sulfuric acid measurements in automobile exhaust: Implications for volatile nanoparticle formation, *Atmospheric Environment*, 40, 7097–7105, <https://doi.org/10.1016/j.atmosenv.2006.06.038>, 2006.
- Arnold, F., Pirjola, L., Rönkkö, T., Reichl, U., Schlager, H., Lähde, T., Heikkilä, J., and Keskinen, J.: First Online Measurements of Sulfuric Acid Gas in Modern Heavy-Duty Diesel Engine Exhaust: Implications for Nanoparticle Formation, *Environmental Science & Technology*, 46, 11 227–11 234, <https://doi.org/10.1021/es302432s>, 2012.
- Auvinen, M., Järvi, L., Hellsten, A., Rannik, U., and Vesala, T.: Numerical framework for the computation of urban flux footprints employing large-eddy simulation and Lagrangian stochastic modeling, *Geoscientific Model Development*, 10, 4187–4205, <https://doi.org/10.5194/gmd-10-4187-2017>, 2017.
- Beard, K. V. and Ochs, H. T.: Collection and coalescence efficiencies for accretion, *Journal of Geophysical Research: Atmospheres*, 89, 7165–7169, <https://doi.org/10.1029/JD089iD05p07165>, 1984.
- Beckett, K., Freer-Smith, P., and Taylor, G.: Urban woodlands: their role in reducing the effects of particulate pollution, *Environmental Pollution*, 99, 347 – 360, [https://doi.org/https://doi.org/10.1016/S0269-7491\(98\)00016-5](https://doi.org/https://doi.org/10.1016/S0269-7491(98)00016-5), 1998.
- Chen, J.-P. and Lamb, D.: Simulation of Cloud Microphysical and Chemical Processes Using a Multicomponent Framework. Part I: Description of the Microphysical Model, *J. Aerosol Sci.*, 51, 2613–2630, [https://doi.org/10.1175/1520-0469\(1994\)051<2613:SOCMAC>2.0.CO;2](https://doi.org/10.1175/1520-0469(1994)051<2613:SOCMAC>2.0.CO;2), 1994.
- Coceal, O., Thomas, T. G., Castro, I. P., and Belcher, S. E.: Mean Flow and Turbulence Statistics Over Groups of Urban-like Cubical Obstacles, *Boundary-Layer Meteorology*, 121, 491–519, <https://doi.org/10.1007/s10546-006-9076-2>, <https://doi.org/10.1007/s10546-006-9076-2>, 2006.

- Dallmann, T. R., Onasch, T. B., Kirchstetter, T. W., Worton, D. R., Fortner, E. C., Herndon, S. C., Wood, E. C., Franklin, J. P., Worsnop, D. R., Goldstein, A. H., and Harley, R. A.: Characterization of particulate matter emissions from on-road gasoline and diesel vehicles using a soot particle aerosol mass spectrometer, *Atmospheric Chemistry and Physics*, 14, 7585–7599, <https://doi.org/10.5194/acp-14-7585-2014>, 2014.
- 5 Deardorff, J. W.: Stratocumulus-capped mixed layers derived from a three-dimensional model, *Boundary-Layer Meteorology*, 18, 495–527, <https://doi.org/10.1007/BF00119502>, 1980.
- Fuchs, N.: *The Mechanics of Aerosols*, (translated from the Russian by R.E. Daisley and M. Fuchs). New York, Pergamon Press, 1964.
- Gakidou, E., Afshin, A., Abajobir, A. A., Abate, K. H., Abbafati, C., Abbas, K. M., and ...Murray, C. J. L.: Global, regional, and national comparative risk assessment of 84 behavioural, environmental and occupational, and metabolic risks or clusters of risks, 1990–2016: a systematic analysis for the Global Burden of Disease Study 2016, *The Lancet*, 390, 1345–1422, [https://doi.org/10.1016/S0140-6736\(17\)32366-8](https://doi.org/10.1016/S0140-6736(17)32366-8), 10 2017.
- García-Sánchez, C., van Beeck, J., and Gorié, C.: Predictive large eddy simulations for urban flows: Challenges and opportunities, *Building and Environment*, 139, 146–156, <https://doi.org/10.1016/j.buildenv.2018.05.007>, 2018.
- Giles-Corti, B., Vernez-Moudon, A., Reis, R., Turrell, G., Dannenberg, A. L., Badland, H., Foster, S., Lowe, M., Sallis, J. F., Stevenson, M., 15 et al.: City planning and population health: a global challenge, *The Lancet*, 388, 2912–2924, 2016.
- Gillner, S., Vogt, J., Tharang, A., Dettmann, S., and Roloff, A.: Role of street trees in mitigating effects of heat and drought at highly sealed urban sites, *Landscape and Urban Planning*, 143, 33 – 42, <https://doi.org/https://doi.org/10.1016/j.landurbplan.2015.06.005>, 2015.
- Gong, S. L., Barrie, L. A., Blanchet, J.-P., von Salzen, K., Lohmann, U., Lesins, G., Spacek, L., Zhang, L. M., Girard, E., Lin, H., Leaitch, R., Leighton, H., Chylek, P., and Huang, P.: Canadian Aerosol Module: A size-segregated simulation of atmospheric aerosol processes 20 for climate and air quality models 1. Module development, *Journal of Geophysical Research: Atmospheres*, 108, AAC 3–1–AAC 3–16, <https://doi.org/10.1029/2001JD002002>, 2003.
- Hackbusch, W.: *Multi-grid methods and applications* (1st ed.), Springer-Verlag Berlin Heidelberg., 1985.
- Harlow, F. H. and Welch, J. E.: Numerical Calculation of Time-Dependent Viscous Incompressible Flow of Fluid with Free Surface, *Physics of Fluids*, 8, 2182–2189, <https://doi.org/10.1063/1.1761178>, 1965.
- 25 Hornsby, K. E. and Pryor, S. C.: A Laboratory Comparison of Real-Time Measurement Methods for 10–100-nm Particle Size Distributions, *Aerosol Science and Technology*, 48, 571–582, <https://doi.org/10.1080/02786826.2014.901488>, 2014.
- Huang, L., Gong, S. L., Gordon, M., Liggio, J., Staebler, R., Stroud, C. A., Lu, G., Mihele, C., Brook, J. R., and Jia, C. Q.: Aerosol-computational fluid dynamics modeling of ultrafine and black carbon particle emission, dilution, and growth near roadways, *Atmospheric Chemistry and Physics*, 14, 12 631–12 648, <https://doi.org/10.5194/acp-14-12631-2014>, 2014.
- 30 Jacobson, M. Z.: *Fundamentals of Atmospheric Modeling*, 2nd Edn., Cambridge University Press, New York, 2005.
- Kanda, M., Inagaki, A., Miyamoto, T., Gryschka, M., and Raasch, S.: A New Aerodynamic Parametrization for Real Urban Surfaces, *Boundary-Layer Meteorology*, 148, 357–377, <https://doi.org/10.1007/s10546-013-9818-x>, 2013.
- Kelly, F. J. and Fussell, J. C.: Size, source and chemical composition as determinants of toxicity attributable to ambient particulate matter, *Atmospheric Environment*, 60, 504 – 526, <https://doi.org/https://doi.org/10.1016/j.atmosenv.2012.06.039>, 2012.
- 35 Kent, C. W., Grimmond, S., and Gatey, D.: Aerodynamic roughness parameters in cities: Inclusion of vegetation, *Journal of Wind Engineering and Industrial Aerodynamics*, 169, 168 – 176, <https://doi.org/10.1016/j.jweia.2017.07.016>, 2017.
- Kent, C. W., Lee, K., Ward, H. C., Hong, J.-W., Hong, J., Gatey, D., and Grimmond, S.: Aerodynamic roughness variation with vegetation: analysis in a suburban neighbourhood and a city park, *Urban Ecosystems*, 21, 227–243, <https://doi.org/10.1007/s11252-017-0710-1>, 2018.

- Kerminen, V.-M. and Kulmala, M.: Analytical formulae connecting the “real” and the “apparent” nucleation rate and the nuclei number concentration for atmospheric nucleation events, *Journal of Aerosol Science*, 33, 609–622, [https://doi.org/10.1016/S0021-8502\(01\)00194-X](https://doi.org/10.1016/S0021-8502(01)00194-X), 2002.
- Kokkola, H., Korhonen, H., Lehtinen, K. E. J., Makkonen, R., Asmi, A., Järvenoja, S., Anttila, T., Partanen, A.-I., Kulmala, M., Järvinen, H.,  
5 Laaksonen, A., and Kerminen, V.-M.: SALSA - a Sectional Aerosol module for Large Scale Applications, *Atmospheric Chemistry and Physics*, 8, 2469–2483, <https://doi.org/10.5194/acp-8-2469-2008>, 2008.
- Kokkola, H., Kühn, T., Laakso, A., Bergman, T., Lehtinen, K. E. J., Mielonen, T., Arola, A., Stadtler, S., Korhonen, H., Ferrachat, S.,  
Lohmann, U., Neubauer, D., Tegen, I., Siegenthaler-Le Drian, C., Schultz, M. G., Bey, I., Stier, P., Daskalakis, N., Heald, C. L., and  
Romakkaniemi, S.: SALSA2.0: The sectional aerosol module of the aerosol–chemistry–climate model ECHAM6.3.0-HAM2.3-MOZ1.0,  
10 *Geoscientific Model Development*, 11, 3833–3863, <https://doi.org/10.5194/gmd-11-3833-2018>, 2018.
- Kudzotsa, I., Kokkola, H., Tonttila, J., Raatikainen, T., and Romakkaniemi, S.: Implementing Gas-to-Particle Partitioning of Semi-Volatile  
Inorganic Compounds in UCLALES-SALSA V1.6, in preparation for Geosci. Model Dev.
- Kumar, P., Fennell, P., Langley, D., and Britter, R.: Pseudo-simultaneous measurements for the vertical variation of coarse, fine and ultrafine  
particles in an urban street canyon, *Atmospheric Environment*, 42, 4304–4319, <https://doi.org/10.1016/j.atmosenv.2008.01.010>, 2008.
- 15 Kumar, P., Garmory, A., Ketzel, M., Berkowicz, R., and Britter, R.: Comparative study of measured and modelled number concentrations of  
nanoparticles in an urban street canyon, *Atmospheric Environment*, 43, 949–958, <https://doi.org/10.1016/j.atmosenv.2008.10.025>, 2009.
- Kumar, P., Ketzel, M., Vardoulakis, S., Pirjola, L., and Britter, R.: Dynamics and dispersion modelling of nanoparticles from road traffic in  
the urban atmospheric environment - a review, *Journal of Aerosol Science*, 42, 580–603, 2011.
- Kurppa, M.: Input data for performing a model evaluation of the sectional aerosol module SALSA embedded to PALM model system 6.0,  
20 version 1.0.1, <https://doi.org/10.5281/zenodo.1565752>, 2018.
- Kurppa, M., Hellsten, A., Auvinen, M., Raasch, S., Vesala, T., and Järvi, L.: Ventilation and Air Quality in City Blocks Using Large-Eddy  
Simulation—Urban Planning Perspective, *Atmosphere*, 9, <https://doi.org/10.3390/atmos9020065>, 2018.
- Lehtinen, K. E., Maso, M. D., Kulmala, M., and Kerminen, V.-M.: Estimating nucleation rates from apparent particle forma-  
tion rates and vice versa: Revised formulation of the Kerminen–Kulmala equation, *Journal of Aerosol Science*, 38, 988–994,  
25 <https://doi.org/10.1016/j.jaerosci.2007.06.009>, 2007.
- Letzel, M. O., Krane, M., and Raasch, S.: High resolution urban large-eddy simulation studies from street canyon to neighbourhood scale,  
*Atmospheric Environment*, 42, 8770–8784, <https://doi.org/10.1016/j.atmosenv.2008.08.001>, 2008.
- Letzel, M. O., Helmke, C., Ng, E., An, X., Lai, A., and Raasch, S.: LES case study on pedestrian level ventilation in two neighbourhoods in  
Hong Kong, *Meteorologische Zeitschrift*, 21, 575–589, <https://doi.org/10.1127/0941-2948/2012/0356>, 2012.
- 30 Li, X., Wang, J., Tu, X., Liu, W., and Huang, Z.: Vertical variations of particle number concentration and size distribution in a street canyon  
in Shanghai, China, *Science of The Total Environment*, 378, 306 – 316, <https://doi.org/10.1016/j.scitotenv.2007.02.040>, 2007.
- Liu, X., Easter, R. C., Ghan, S. J., Zaveri, R., Rasch, P., Shi, X., Lamarque, J.-F., Gettelman, A., Morrison, H., Vitt, F., Conley, A., Park,  
S., Neale, R., Hannay, C., Ekman, A. M. L., Hess, P., Mahowald, N., Collins, W., Iacono, M. J., Bretherton, C. S., Flanner, M. G., and  
Mitchell, D.: Toward a minimal representation of aerosols in climate models: description and evaluation in the Community Atmosphere  
35 Model CAM5, *Geoscientific Model Development*, 5, 709–739, <https://doi.org/10.5194/gmd-5-709-2012>, 2012.
- Liu, Y. H., He, Z., and Chan, T. L.: Three-Dimensional Simulation of Exhaust Particle Dispersion and Concentration Fields in the Near-Wake  
Region of the Studied Ground Vehicle, *Aerosol Science and Technology*, 45, 1019–1030, <https://doi.org/10.1080/02786826.2011.580021>,  
<https://doi.org/10.1080/02786826.2011.580021>, 2011.

- Maricq, M. M.: Chemical characterization of particulate emissions from diesel engines: A review, *Journal of Aerosol Science*, 38, 1079–1118, <https://doi.org/10.1016/j.jaerosci.2007.08.001>, 2007.
- Marini, S., Buonanno, G., Stabile, L., and Avino, P.: A benchmark for numerical scheme validation of airborne particle exposure in street canyons, *Environmental Science and Pollution Research*, 22, 2051–2063, <https://doi.org/10.1007/s11356-014-3491-6>, <https://doi.org/10.1007/s11356-014-3491-6>, 2015.
- Maronga, B. and Bosveld, F. C.: Key parameters for the life cycle of nocturnal radiation fog: a comprehensive large-eddy simulation study, *Quarterly Journal of the Royal Meteorological Society*, 143, 2463–2480, <https://doi.org/10.1002/qj.3100>, 2017.
- Maronga, B., Gryschka, M., Heinze, R., Hoffmann, F., Kanani-Sühring, F., Keck, M., Ketelsen, K., Letzel, M. O., Sühring, M., and Raasch, S.: The Parallelized Large-Eddy Simulation Model (PALM) version 4.0 for atmospheric and oceanic flows: model formulation, recent developments, and future perspectives, *Geoscientific Model Development*, 8, 2515–2551, <https://doi.org/10.5194/gmd-8-2515-2015>, 2015.
- Maronga, B., Gross, G., Raasch, S., Banzhaf, S., Forkel, R., Heldens, W., Kanani-Sühring, F., Matzarakis, A., Mauder, M., Pavlik, D., Pfaffner, J., Seckmeyer, G., Sieker, H., and Trusilova, K.: Development of a new urban climate model based on the model PALM - Project overview, planned work, and first achievements, *Accepted to Meteorologische Zeitschrift*, <https://doi.org/10.1127/metz/2019/0909>, 2019.
- Maronga, B. et al.: The PALM model system 6.0: Model overview and description of the model core, in preparation for *Geosci. Model Dev.*, 2019.
- McGraw, R.: Description of Aerosol Dynamics by the Quadrature Method of Moments, *Aerosol Science and Technology*, 27, 255–265, <https://doi.org/10.1080/02786829708965471>, 1997.
- Mingxuan, W., Xiaohong, L., Leiming, Z., Chenglai, W., Zheng, L., Po-Lun, M., Hailong, W., Simone, T., Natalie, M., Hitoshi, M., and C., E. R.: Impacts of Aerosol Dry Deposition on Black Carbon Spatial Distributions and Radiative Effects in the Community Atmosphere Model CAM5, *Journal of Advances in Modeling Earth Systems*, <https://doi.org/10.1029/2017MS001219>, 2018.
- Miyakawa, T., Takegawa, N., and Kondo, Y.: Removal of sulfur dioxide and formation of sulfate aerosol in Tokyo, *Journal of Geophysical Research: Atmospheres*, 112, <https://doi.org/10.1029/2006JD007896>, 2007.
- Moeng, C.-H. and Wyngaard, J. C.: Spectral Analysis of Large-Eddy Simulations of the Convective Boundary Layer, *Journal of the Atmospheric Sciences*, 45, 3573–3587, [https://doi.org/10.1175/1520-0469\(1988\)045<3573:SAOLES>2.0.CO;2](https://doi.org/10.1175/1520-0469(1988)045<3573:SAOLES>2.0.CO;2), 1988.
- Monin, A. S. and Obukhov, A.: Basic laws of turbulent mixing in the surface layer of the atmosphere (in Russian), *Trudy Geofiz, Instituta Akademii Nauk, SSSR*, 24(151), 163–187, 1954.
- Napari, I., Noppel, M., Vehkamäki, H., and Kulmala, M.: An improved model for ternary nucleation of sulfuric acid–ammonia–water, *The Journal of Chemical Physics*, 116, 4221–4227, <https://doi.org/10.1063/1.1450557>, 2002a.
- Napari, I., Noppel, M., Vehkamäki, H., and Kulmala, M.: Parametrization of ternary nucleation rates for H<sub>2</sub>SO<sub>4</sub>–NH<sub>3</sub>–H<sub>2</sub>O vapors, *Journal of Geophysical Research: Atmospheres*, 107, AAC 6–1–AAC 6–6, <https://doi.org/10.1029/2002JD002132>, 4381, 2002b.
- Öström, E., Putian, Z., Schurgers, G., Mishurov, M., Kivekäs, N., Lihavainen, H., Ehn, M., Rissanen, M. P., Kurtén, T., Boy, M., Swietlicki, E., and Roldin, P.: Modeling the role of highly oxidized multifunctional organic molecules for the growth of new particles over the boreal forest region, *Atmospheric Chemistry and Physics*, 17, 8887–8901, <https://doi.org/10.5194/acp-17-8887-2017>, <https://www.atmos-chem-phys.net/17/8887/2017/>, 2017.
- Paasonen, P., Kupiainen, K., Klimont, Z., Visschedijk, A., Denier van der Gon, H. A. C., and Amann, M.: Continental anthropogenic primary particle number emissions, *Atmospheric Chemistry and Physics*, 16, 6823–6840, <https://doi.org/10.5194/acp-16-6823-2016>, <https://www.atmos-chem-phys.net/16/6823/2016/>, 2016.

- Park, S.-B., Baik, J.-J., and Lee, S.-H.: Impacts of Mesoscale Wind on Turbulent Flow and Ventilation in a Densely Built-up Urban Area, *Journal of Applied Meteorology and Climatology*, 54, 811–824, <https://doi.org/10.1175/JAMC-D-14-0044.1>, 2015.
- Petroff, A. and Zhang, L.: Development and validation of a size-resolved particle dry deposition scheme for application in aerosol transport models, *Geoscientific Model Development*, 3, 753–769, <https://doi.org/10.5194/gmd-3-753-2010>, 2010.
- 5 Popek, R., Gawrońska, H., Wrochna, M., Gawroński, S. W., and Sæbø, A.: Particulate Matter on Foliage of 13 Woody Species: Deposition on Surfaces and Phytostabilisation in Waxes – a 3-Year Study, *International Journal of Phytoremediation*, 15, 245–256, <https://doi.org/10.1080/15226514.2012.694498>, PMID: 23488010, 2013.
- Prandtl, L.: Bericht uber Untersuchungen zur ausgebildeten Turbulenz, *Zs. angew. Math. Mech.*, 5, 136–139, 1925.
- Pryor, S. C. and Binkowski, F. S.: An Analysis of the Time Scales Associated with Aerosol Processes during Dry Deposition, *Aerosol Science and Technology*, 38, 1091–1098, <https://doi.org/10.1080/027868290885827>, 2004.
- 10 Quang, T. N., He, C., Morawska, L., Knibbs, L. D., and Falk, M.: Vertical particle concentration profiles around urban office buildings, *Atmospheric Chemistry and Physics*, 12, 5017–5030, <https://doi.org/10.5194/acp-12-5017-2012>, 2012.
- Raasch, S. and Schröter, M.: PALM - A large-eddy simulation model performing on massively parallel computers, *Meteorologische Zeitschrift*, 10, 363–372, 2001.
- 15 Razak, A. A., Hagishima, A., Ikegaya, N., and Tanimoto, J.: Analysis of airflow over building arrays for assessment of urban wind environment, *Building and Environment*, 59, 56–65, <https://doi.org/10.1016/j.buildenv.2012.08.007>, 2013.
- Resler, J., Krč, P., Belda, M., Juruš, P., Benešová, N., Lopata, J., Vlček, O., Damašková, D., Eben, K., Derbek, P., Maronga, B., and Kanani-Sühring, F.: PALM-USM v1.0: A new urban surface model integrated into the PALM large-eddy simulation model, *Geoscientific Model Development*, 10, 3635–3659, <https://doi.org/10.5194/gmd-10-3635-2017>, 2017.
- 20 Riipinen, I., Sihto, S.-L., Kulmala, M., Arnold, F., Dal Maso, M., Birmili, W., Saarnio, K., Teinilä, K., Kerminen, V.-M., Laaksonen, A., and Lehtinen, K. E. J.: Connections between atmospheric sulphuric acid and new particle formation during QUEST III-IV campaigns in Heidelberg and Hyytiälä, *Atmospheric Chemistry and Physics*, 7, 1899–1914, <https://doi.org/10.5194/acp-7-1899-2007>, 2007.
- Roldin, P., Swietlicki, E., Schurgers, G., Arneth, A., Lehtinen, K. E. J., Boy, M., and Kulmala, M.: Development and evaluation of the aerosol dynamics and gas phase chemistry model ADCHEM, *Atmospheric Chemistry and Physics*, 11, 5867–5896, [https://doi.org/10.5194/acp-](https://doi.org/10.5194/acp-11-5867-2011)
- 25 11-5867-2011, 2011.
- Rönkkö, T., Virtanen, A., Kannosto, J., Keskinen, J., Lappi, M., and Pirjola, L.: Nucleation Mode Particles with a Nonvolatile Core in the Exhaust of a Heavy Duty Diesel Vehicle, *Environmental Science & Technology*, 41, 6384–6389, <https://doi.org/10.1021/es0705339>, PMID: 17948783, 2007.
- Saiki, E. M., Moeng, C.-H., and Sullivan, P. P.: Large-Eddy Simulation Of The Stably Stratified Planetary Boundary Layer, *Boundary-Layer Meteorology*, 95, 1–30, <https://doi.org/10.1023/A:1002428223156>, 2000.
- 30 Sajani, S. Z., Marchesi, S., Trentini, A., Bacco, D., Zigola, C., Rovelli, S., Ricciardelli, I., Maccone, C., Lauriola, P., Cavallo, D. M., Poluzzi, V., Cattaneo, A., and Harrison, R. M.: Vertical variation of PM<sub>2.5</sub> mass and chemical composition, particle size distribution, NO<sub>2</sub>, and BTEX at a high rise building, *Environmental Pollution*, 235, 339 – 349, <https://doi.org/10.1016/j.envpol.2017.12.090>, 2018.
- Sihto, S.-L., Kulmala, M., Kerminen, V.-M., Dal Maso, M., Petäjä, T., Riipinen, I., Korhonen, H., Arnold, F., Janson, R., Boy, M., Laaksonen, A., and Lehtinen, K. E. J.: Atmospheric sulphuric acid and aerosol formation: implications from atmospheric measurements for nucleation and early growth mechanisms, *Atmospheric Chemistry and Physics*, 6, 4079–4091, <https://doi.org/10.5194/acp-6-4079-2006>, 2006.
- 35 Steffens, J. T., Heist, D. K., Perry, S. G., and Zhang, K. M.: Modeling the effects of a solid barrier on pollutant dispersion under various atmospheric stability conditions, *Atmospheric Environment*, 69, 76 – 85, <https://doi.org/10.1016/j.atmosenv.2012.11.051>, 2013.

- Stein, A. F., Draxler, R. R., Rolph, G. D., Stunder, B. J. B., Cohen, M. D., and Ngan, F.: NOAA's HYSPLIT Atmospheric Transport and Dispersion Modeling System, *Bulletin of the American Meteorological Society*, 96, 2059–2077, <https://doi.org/10.1175/BAMS-D-14-00110.1>, 2015.
- Stokes, R. H. and Robinson, R. A.: Interactions in Aqueous Nonelectrolyte Solutions. I. Solute-Solvent Equilibria, *The Journal of Physical Chemistry*, 70, 2126–2131, <https://doi.org/10.1021/j100879a010>, 1966.
- Sæbø, A., Popek, R., Nawrot, B., Hanslin, H., Gawronska, H., and Gawronski, S.: Plant species differences in particulate matter accumulation on leaf surfaces, *Science of The Total Environment*, 427–428, 347 – 354, <https://doi.org/https://doi.org/10.1016/j.scitotenv.2012.03.084>, 2012.
- Tominaga, Y. and Stathopoulos, T.: Ten questions concerning modeling of near-field pollutant dispersion in the built environment, *Building and Environment*, 105, 390 – 402, <https://doi.org/https://doi.org/10.1016/j.buildenv.2016.06.027>, 2016.
- Tong, Z., Baldauf, R. W., Isakov, V., Deshmukh, P., and Zhang, K. M.: Roadside vegetation barrier designs to mitigate near-road air pollution impacts, *Science of The Total Environment*, 541, 920–927, <https://doi.org/10.1016/j.scitotenv.2015.09.067>, 2016a.
- Tong, Z., Chen, Y., Malkawi, A., Adamkiewicz, G., and Spengler, J. D.: Quantifying the impact of traffic-related air pollution on the indoor air quality of a naturally ventilated building, *Environment International*, 89–90, 138–146, <https://doi.org/10.1016/j.envint.2016.01.016>, 2016b.
- Tonttila, J., Maalick, Z., Raatikainen, T., Kokkola, H., Kühn, T., and Romakkaniemi, S.: UCLALES–SALSA v1.0: a large-eddy model with interactive sectional microphysics for aerosol, clouds and precipitation, *Geoscientific Model Development*, 10, 169–188, <https://doi.org/10.5194/gmd-10-169-2017>, 2017.
- Topping, D., Lowe, D., and McFiggans, G.: Partial Derivative Fitted Taylor Expansion: An efficient method for calculating gas-liquid equilibria in atmospheric aerosol particles: 1. Inorganic compounds, *Journal of Geophysical Research: Atmospheres*, 114, <https://doi.org/10.1029/2008JD010099>, 2009.
- Uhrner, U., von Löwis, S., Vehkamäki, H., Wehner, B., Bräsel, S., Hermann, M., Stratmann, F., Kulmala, M., and Wiedensohler, A.: Dilution and aerosol dynamics within a diesel car exhaust plume—CFD simulations of on-road measurement conditions, *Atmospheric Environment*, 41, 7440–7461, <https://doi.org/10.1016/j.atmosenv.2007.05.057>, 2007.
- Vehkamäki, H., Kulmala, M., Napari, I., Lehtinen, K. E. J., Timmreck, C., Noppel, M., and Laaksonen, A.: An improved parameterization for sulfuric acid–water nucleation rates for tropospheric and stratospheric conditions, *Journal of Geophysical Research*, 107, 4622, <https://doi.org/10.1029/2002JD002184>, 2002.
- Vignati, E., Wilson, J., and Stier, P.: M7: An efficient size-resolved aerosol microphysics module for large-scale aerosol transport models, *Journal of Geophysical Research: Atmospheres*, 109, <https://doi.org/10.1029/2003JD004485>, 2004.
- Walker, H.: Fleet weighted Road Transport Emission Factor 2008, National Atmospheric Emissions Inventory, <http://naei.beis.gov.uk/data/ef-transport>, 2011.
- Wang, Y. J. and Zhang, K. M.: Coupled turbulence and aerosol dynamics modeling of vehicle exhaust plumes using the CTAG model, *Atmospheric Environment*, 59, 284–293, <https://doi.org/10.1016/j.atmosenv.2012.04.062>, 2012.
- Weber, S., Kuttler, W., and Weber, K.: Flow characteristics and particle mass and number concentration variability within a busy urban street canyon, *Atmospheric Environment*, 40, 7565 – 7578, <https://doi.org/https://doi.org/10.1016/j.atmosenv.2006.07.002>, 2006.
- Whitby, E. R. and McMurry, P. H.: Modal Aerosol Dynamics Modeling, *Aerosol Science and Technology*, 27, 673–688, <https://doi.org/10.1080/02786829708965504>, 1997.
- WHO: Ambient air pollution: A global assessment of exposure and burden of disease, 2016.



- Wicker, L. and Skamarock, W.: Time-splitting methods for elastic models using forward time schemes, *Monthly Weather Review*, 130, 2088–2097, 2002.
- Williamson, J. H.: Low-Storage Runge-Kutta Schemes, *Journal of Computational Physics*, 35, 48–56, [https://doi.org/10.1016/0021-9991\(80\)90033-9](https://doi.org/10.1016/0021-9991(80)90033-9), 1980.
- 5 Wright, D. L., Kasibhatla, P. S., McGraw, R., and Schwartz, S. E.: Description and evaluation of a six-moment aerosol microphysical module for use in atmospheric chemical transport models, *Journal of Geophysical Research: Atmospheres* (1984–2012), 106, 20 275–20 291, <https://doi.org/10.1029/2001JD900098>, 2001.
- Xie, Z. and Castro, I. P.: LES and RANS for Turbulent Flow over Arrays of Wall-Mounted Obstacles, *Flow, Turbulence and Combustion*, 76, 291, <https://doi.org/10.1007/s10494-006-9018-6>, 2006.
- 10 Young, K. C.: A Numerical Simulation of Wintertime, Orographic Precipitation: Part I. Description of Model Microphysics and Numerical Techniques., *J. Atmos. Sci.*, 31, 1735–1748, [https://doi.org/10.1175/1520-0469\(1974\)031<1735:ANSOWO>2.0.CO;2](https://doi.org/10.1175/1520-0469(1974)031<1735:ANSOWO>2.0.CO;2), 1974.
- Zaveri, R. A., Easter, R. C., Fast, J. D., and Peters, L. K.: Model for Simulating Aerosol Interactions and Chemistry (MOSAIC), *Journal of Geophysical Research: Atmospheres*, 113, <https://doi.org/10.1029/2007JD008782>, 2008.
- Zhang, L., Gong, S., Padro, J., and Barrie, L.: A size-segregated particle dry deposition scheme for an atmospheric aerosol module, *Atmo-*  
15 *spheric Environment*, 35, 549–560, [https://doi.org/10.1016/S1352-2310\(00\)00326-5](https://doi.org/10.1016/S1352-2310(00)00326-5), 2001.
- Zhang, Y., Seigneur, C., Seinfeld, J. H., Jacobson, M. Z., and Binkowski, F. S.: Simulation of Aerosol Dynamics: A Comparative Review of Algorithms Used in Air Quality Models, *Aerosol Science and Technology*, pp. 487–514, 1999.
- Zhang, Y., Pun, B., Vijayaraghavan, K., Wu, S., Seigneur, C., Pandis, S. N., Jacobson, M. Z., Nenes, A., and Seinfeld, J. H.: Development and application of the Model of Aerosol Dynamics, Reaction, Ionization, and Dissolution (MADRID), *Journal of Geophysical Research:*  
20 *Atmospheres*, 109, <https://doi.org/10.1029/2003JD003501>, 2004.
- Zhao, Y., Saleh, R., Saliba, G., Presto, A. A., Gordon, T. D., Drozd, G. T., Goldstein, A. H., Donahue, N. M., and Robinson, A. L.: Reducing secondary organic aerosol formation from gasoline vehicle exhaust, *Proceedings of the National Academy of Sciences*, 114, 6984–6989, <https://doi.org/10.1073/pnas.1620911114>, 2017.
- Zhong, J., Cai, X.-M., and Bloss, W. J.: Coupling dynamics and chemistry in the air pollution modelling of street canyons: A review,  
25 *Environmental Pollution*, 214, 690–704, <https://doi.org/10.1016/j.envpol.2016.04.052>, 2016.
